# Supplementary material for: Gram-scale carbasugar synthesis via intramolecular seleno-Michael/aldol reaction
Source: Royal Society of Chemistry journal article supplement (doi:10.1039/c9ra02002k), 2019-01-01
Supplement: c9ra02002k1.pdf [file c9ra02002k1.pdf]

## Gram-scale carbasugars synthesis *via* intramolecular *seleno-Michael/aldol* reaction

Piotr Banachowicz<sup>a</sup> and Szymon Buda\*<sup>a</sup>

<sup>a</sup>Faculty of Chemistry, Jagiellonian University, Gronostajowa 2, 30-387 Krakow

szym.buda@gmail.com

### Table of Contents

|                                                           |           |
|-----------------------------------------------------------|-----------|
| <b><sup>1</sup>H and <sup>13</sup>C NMR spectra .....</b> | <b>S2</b> |
|-----------------------------------------------------------|-----------|

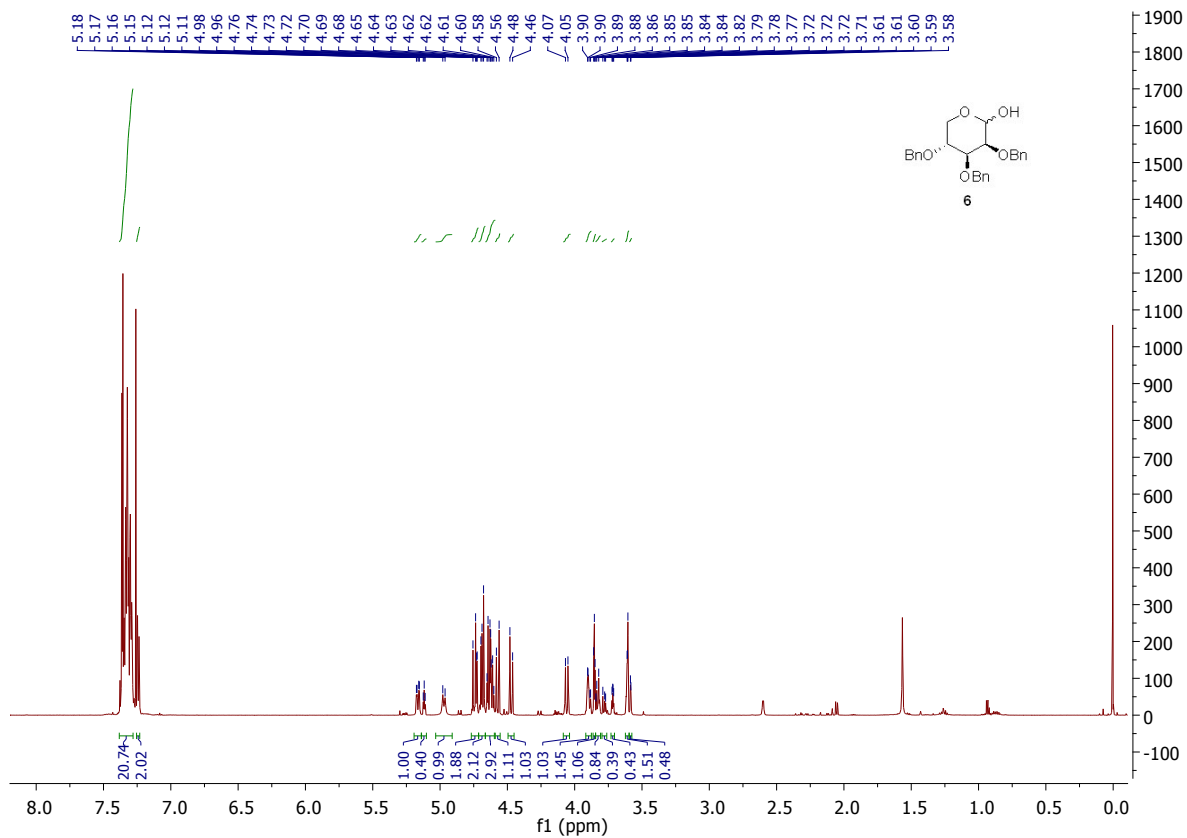

<sup>1</sup>H-NMR Spectrum of Compound 6 (CDCl<sub>3</sub>)

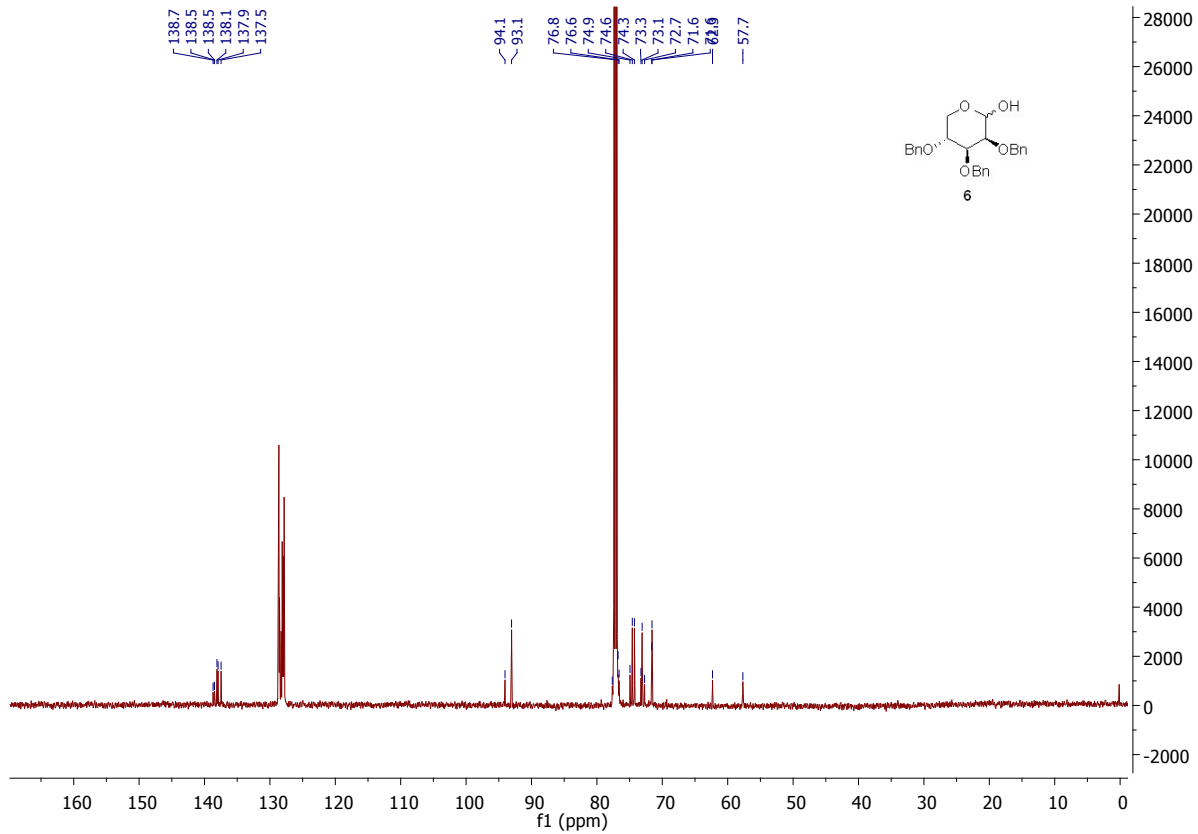

<sup>13</sup>C-NMR Spectrum of Compound 6 (CDCl<sub>3</sub>)

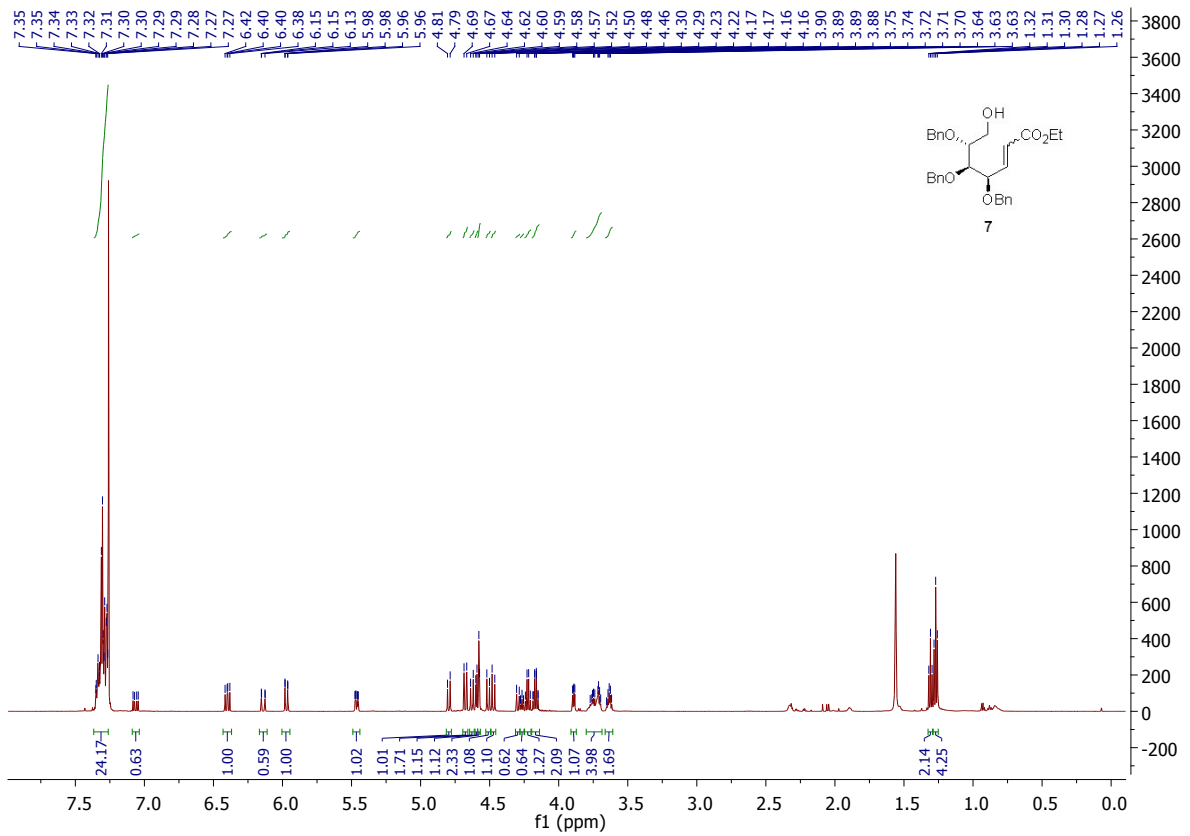

<sup>1</sup>H-NMR Spectrum of Compound 7 (CDCl<sub>3</sub>)

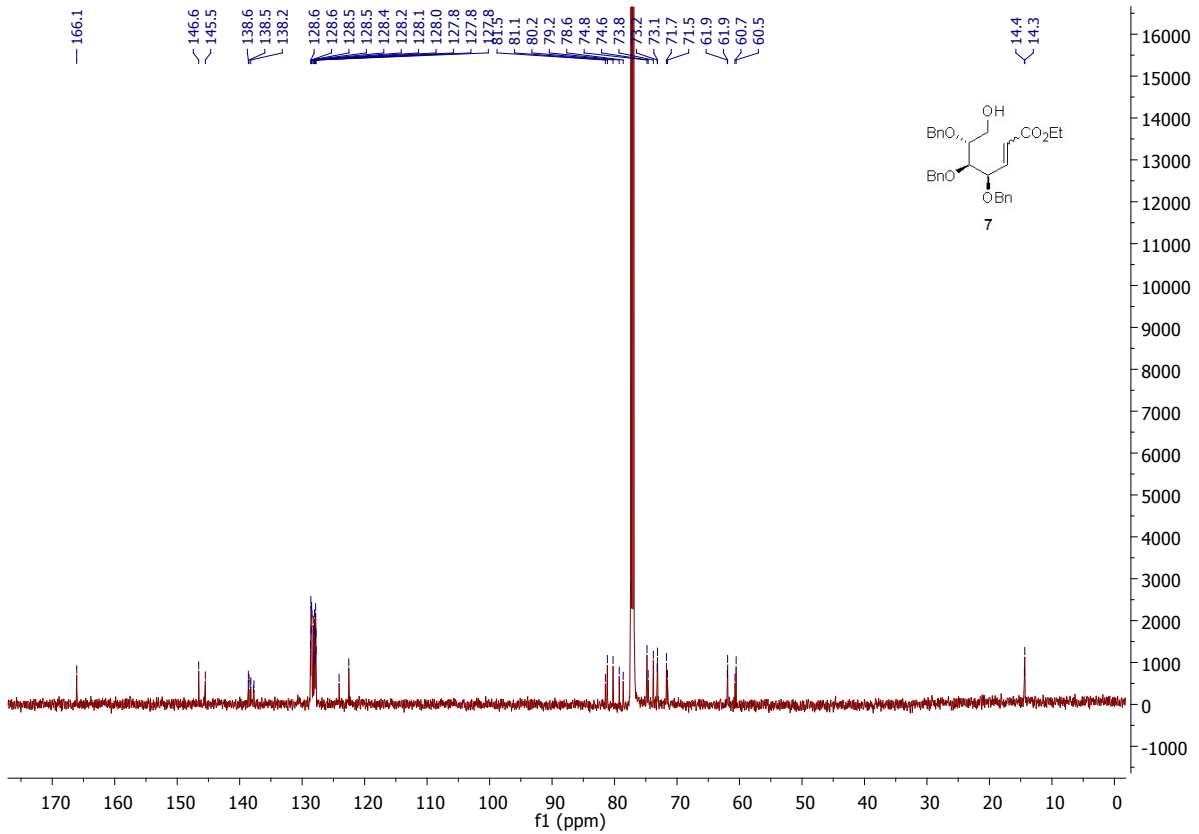

<sup>13</sup>C-NMR Spectrum of Compound 7 (CDCl<sub>3</sub>)

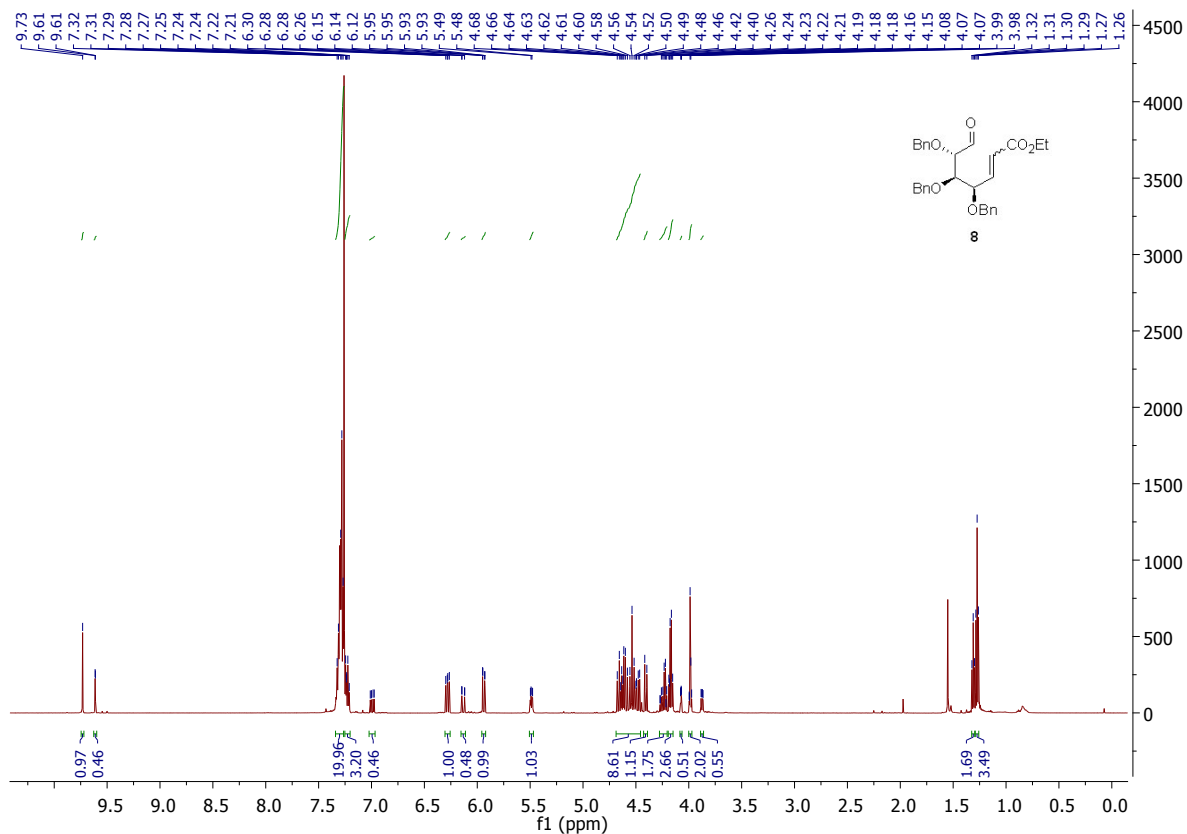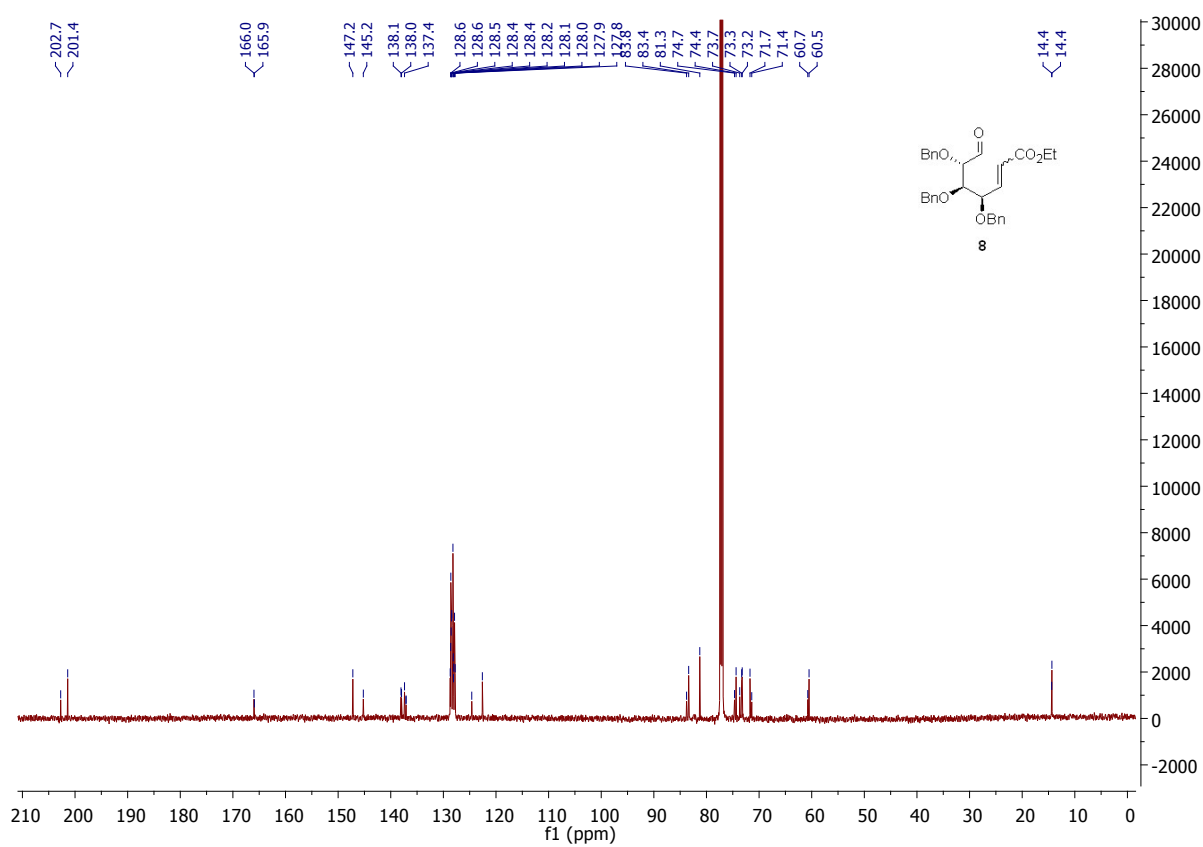

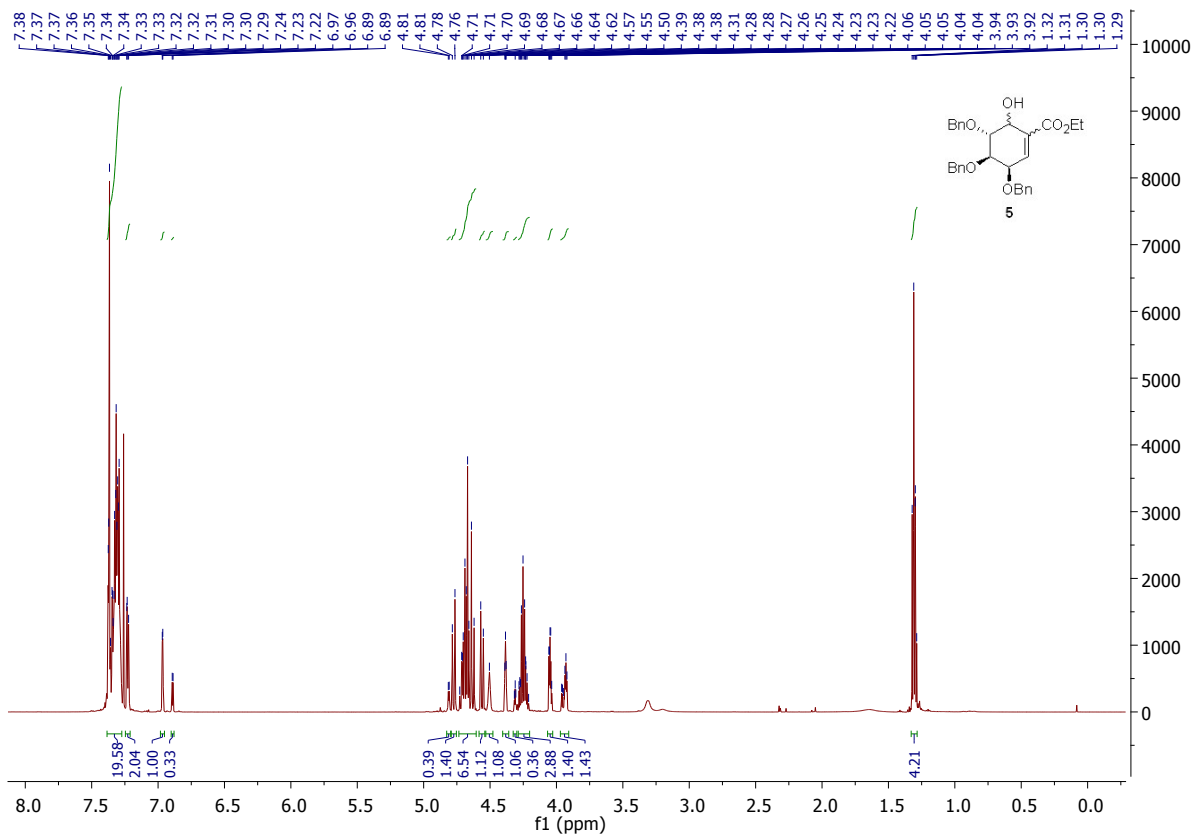

**<sup>1</sup>H-NMR Spectrum of Compound 5 (CDCl<sub>3</sub>)**

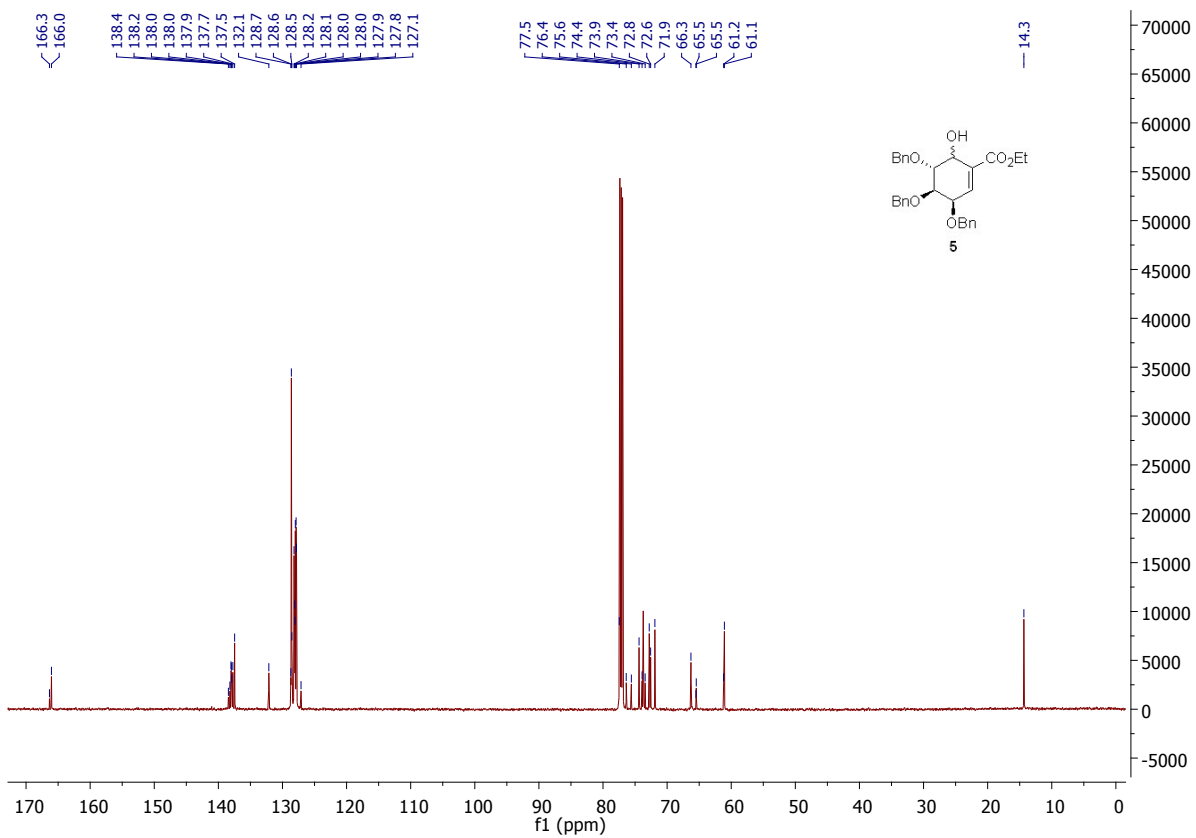

**<sup>13</sup>C-NMR Spectrum of Compound 5 (CDCl<sub>3</sub>)**

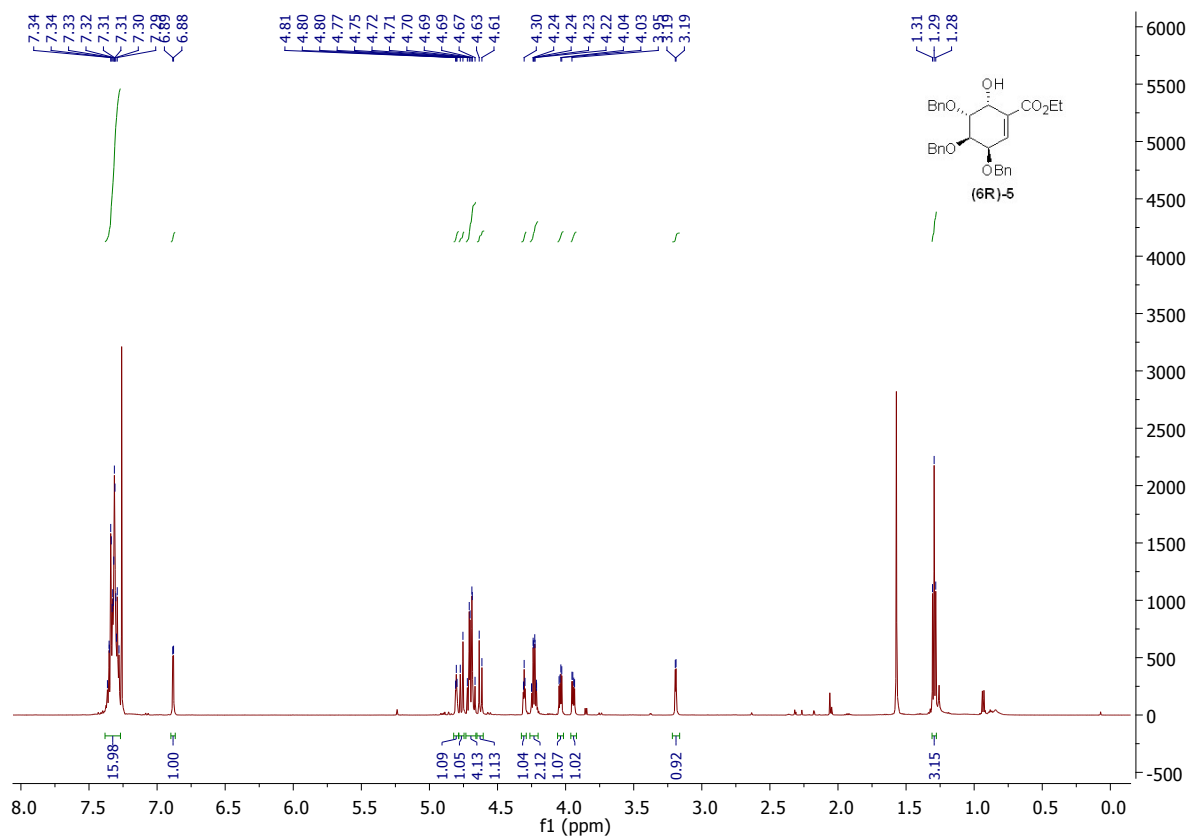

**<sup>1</sup>H-NMR Spectrum of Compound (6R)-5 (CDCl<sub>3</sub>)**

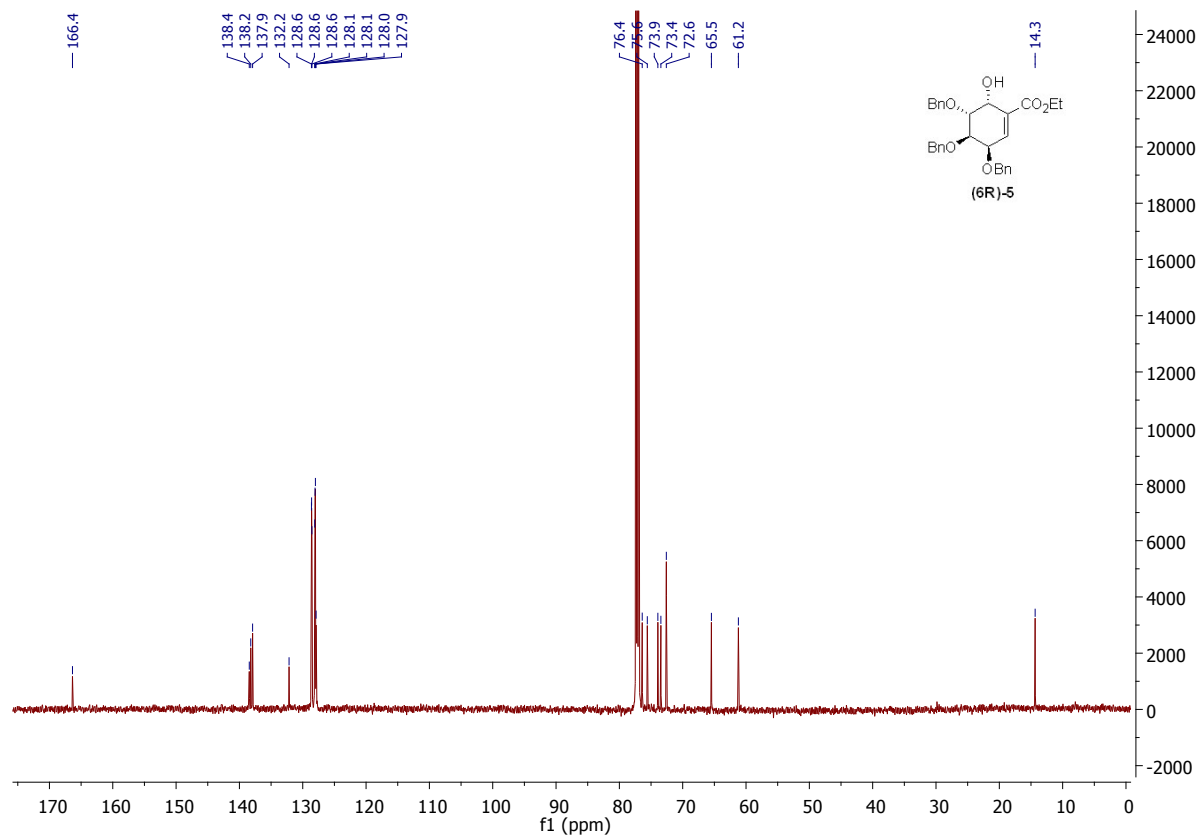

**<sup>13</sup>C-NMR Spectrum of Compound (6R)-5 (CDCl<sub>3</sub>)**

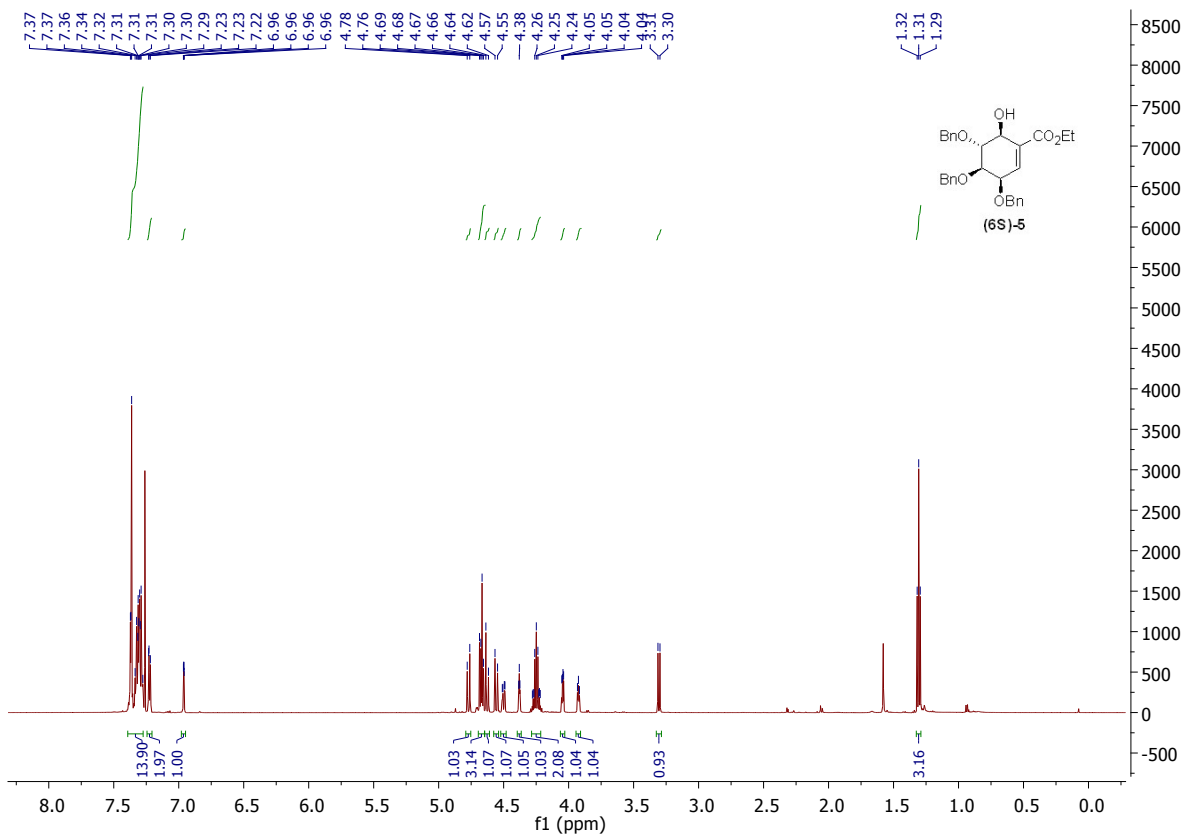

**<sup>1</sup>H-NMR Spectrum of Compound (6S)-5 (CDCl<sub>3</sub>)**

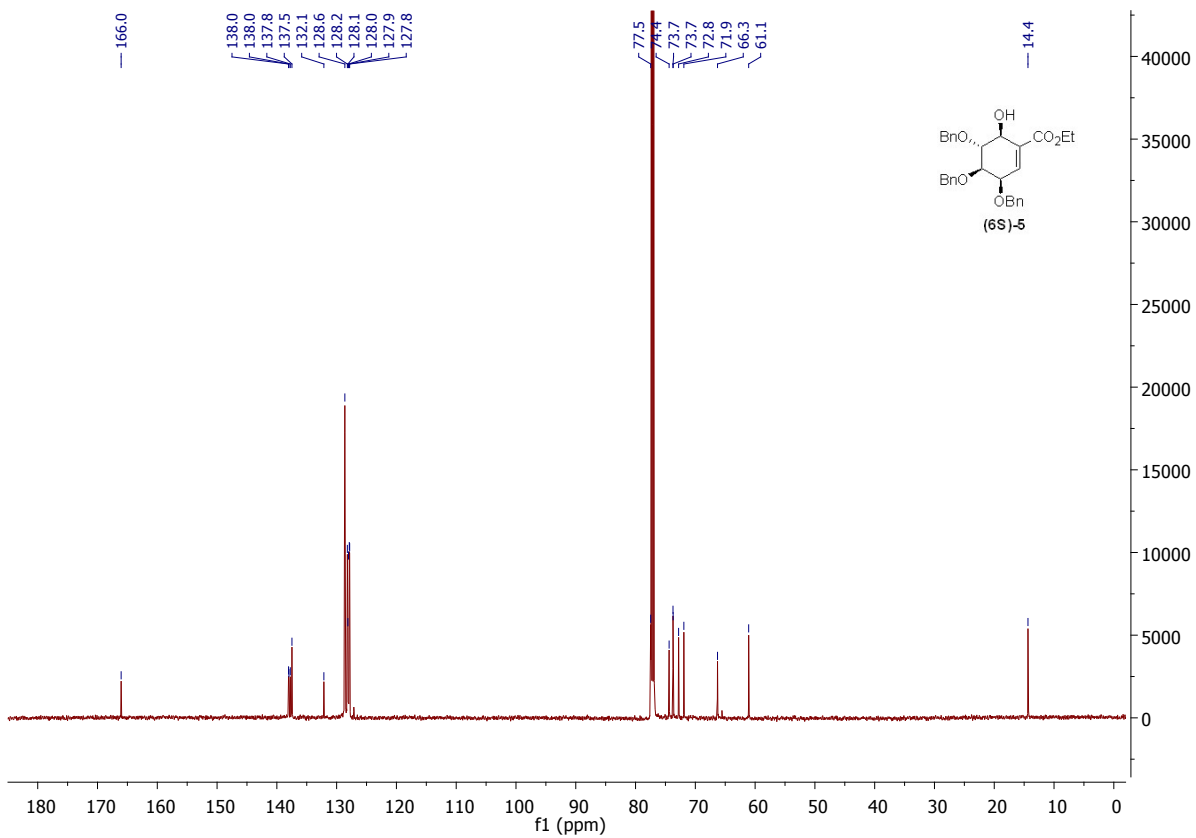

**<sup>13</sup>C-NMR Spectrum of Compound (6S)-5 (CDCl<sub>3</sub>)**

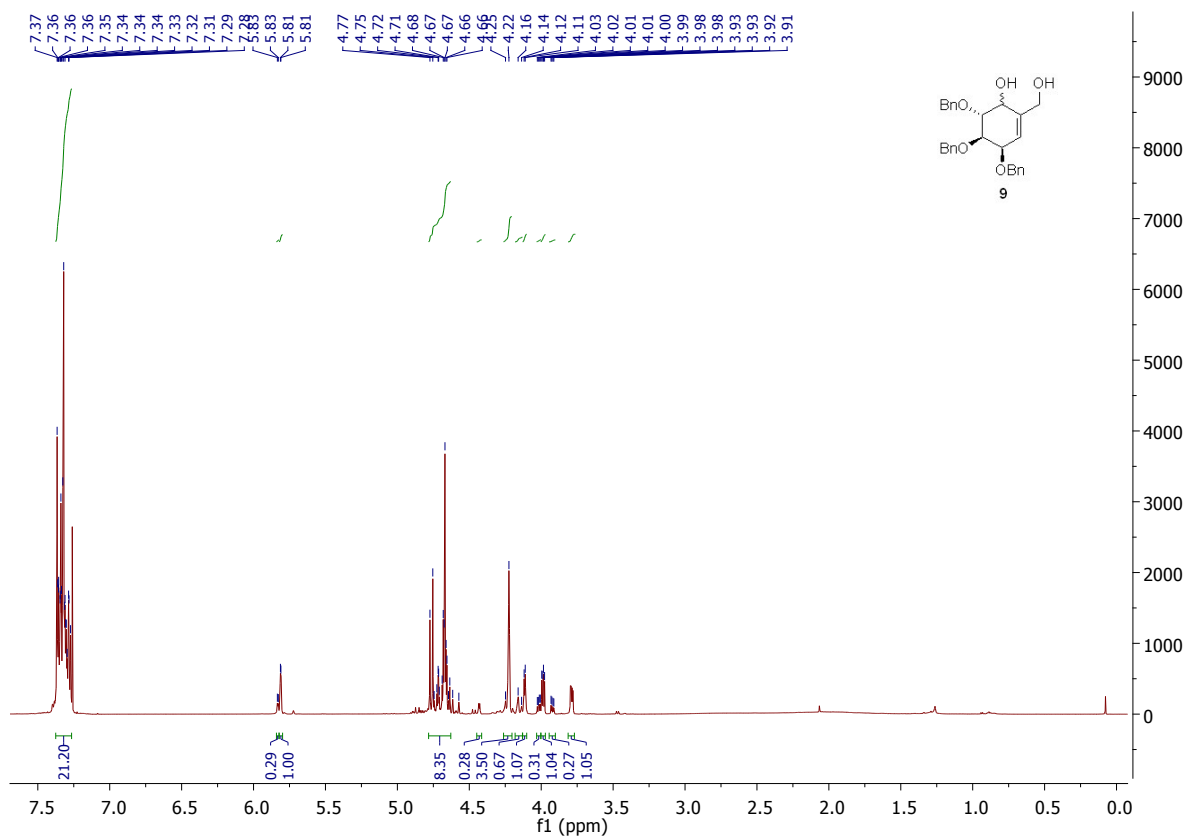

**<sup>1</sup>H-NMR Spectrum of Compound 9 (CDCl<sub>3</sub>)**

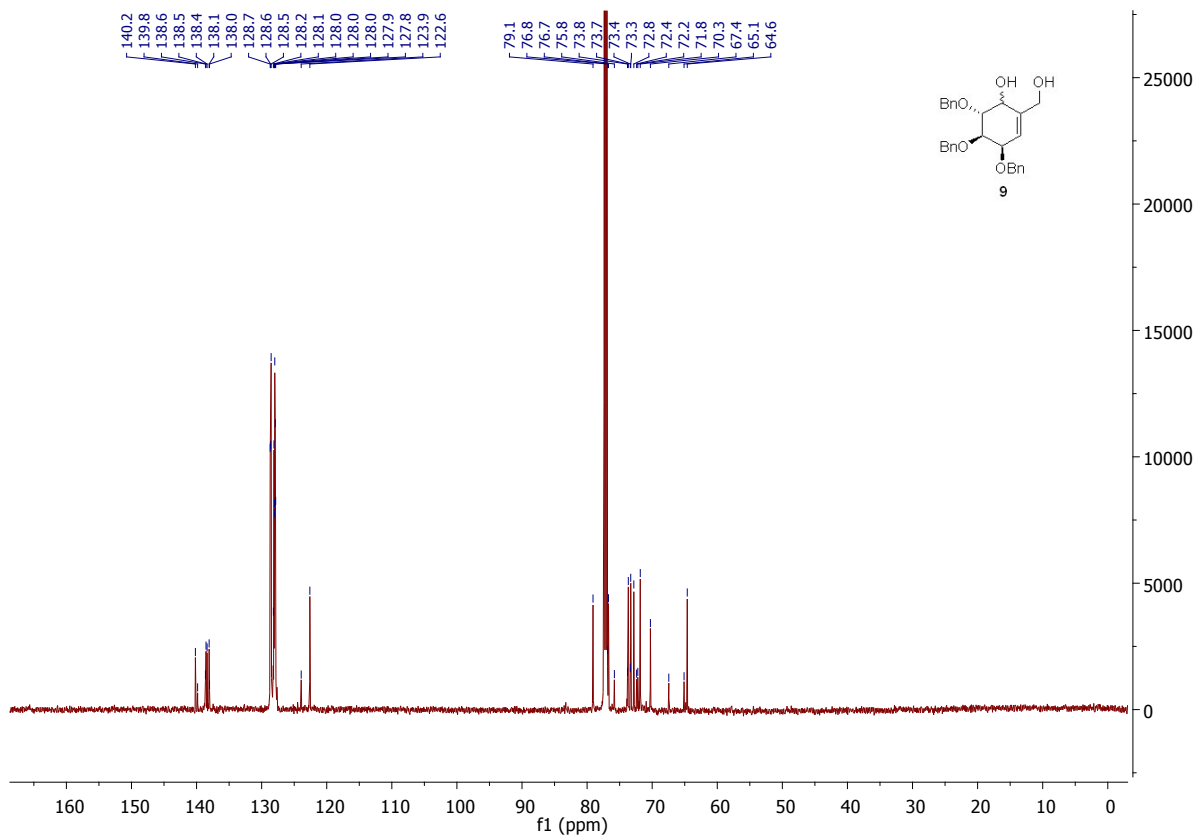

**<sup>13</sup>C-NMR Spectrum of Compound 9 (CDCl<sub>3</sub>)**



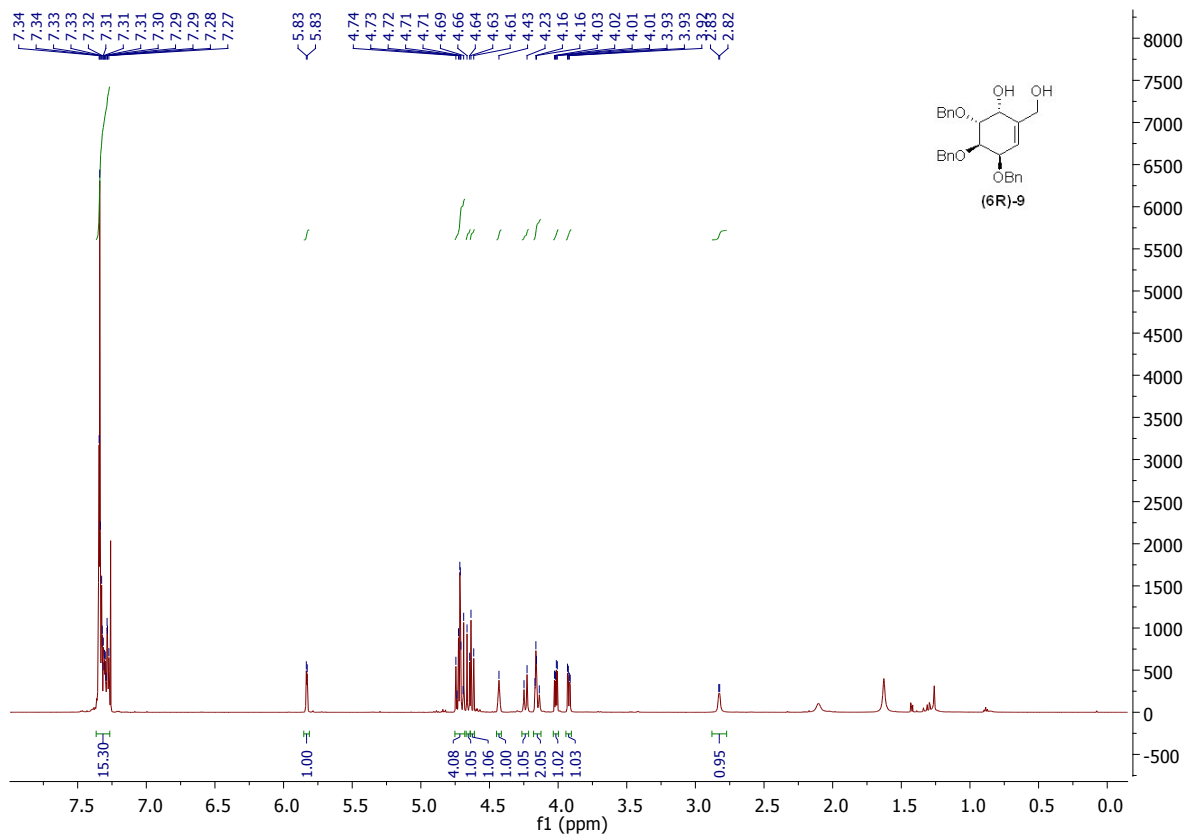

<sup>1</sup>H-NMR Spectrum of Compound (6R)-9 (CDCl<sub>3</sub>)

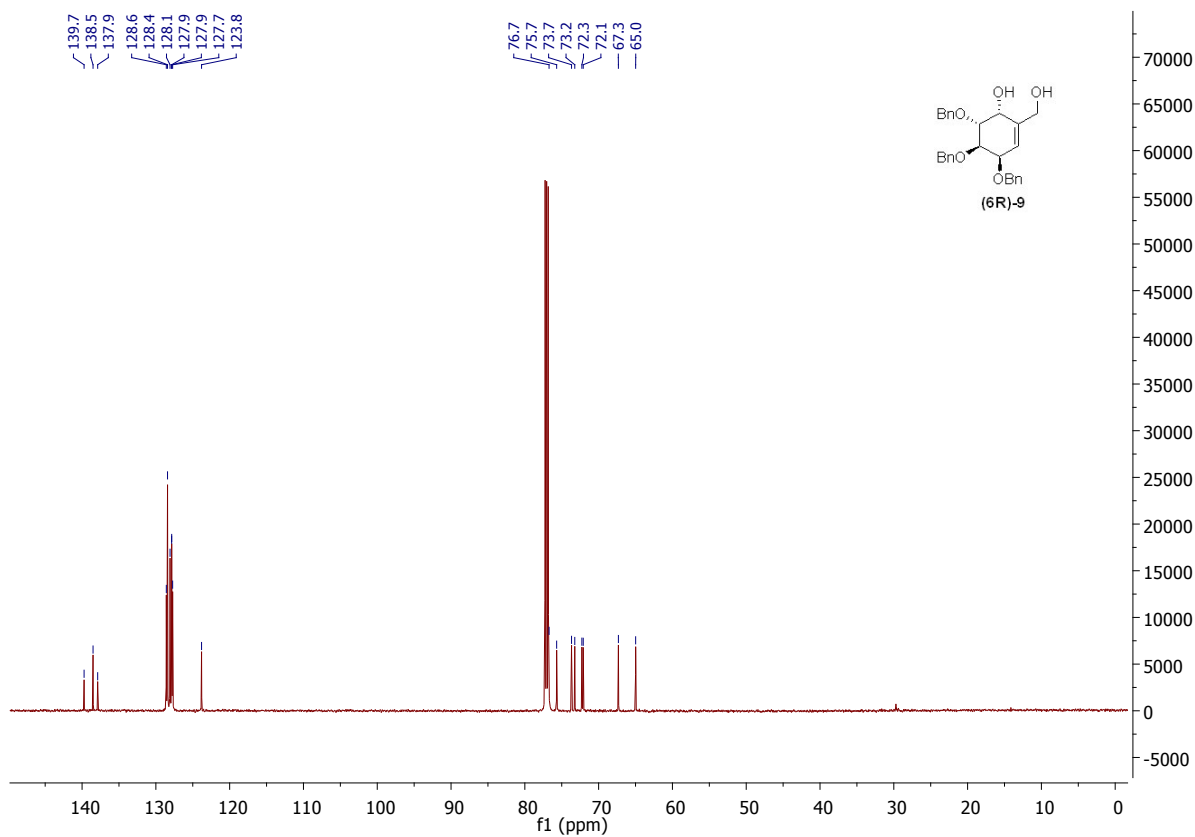

<sup>13</sup>C-NMR Spectrum of Compound (6R)-9 (CDCl<sub>3</sub>)

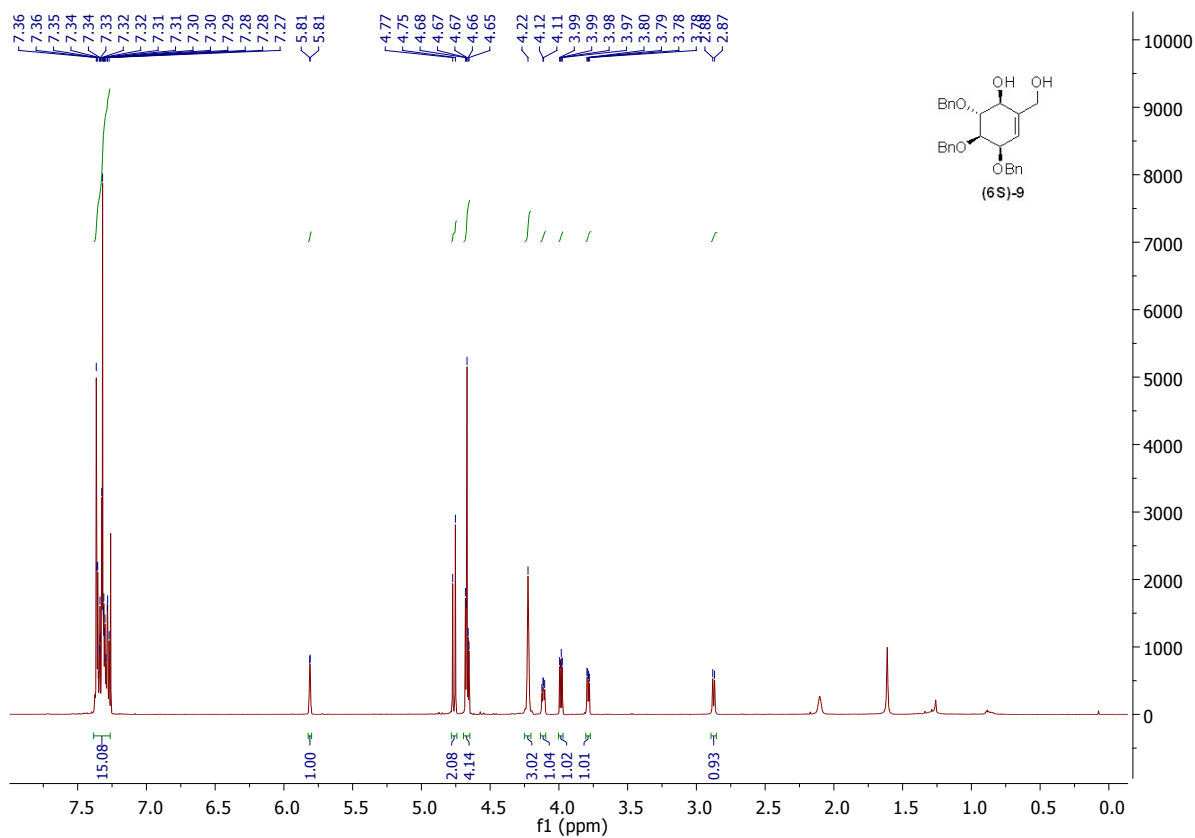

**<sup>1</sup>H-NMR Spectrum of Compound (6S)-9 (CDCl<sub>3</sub>)**

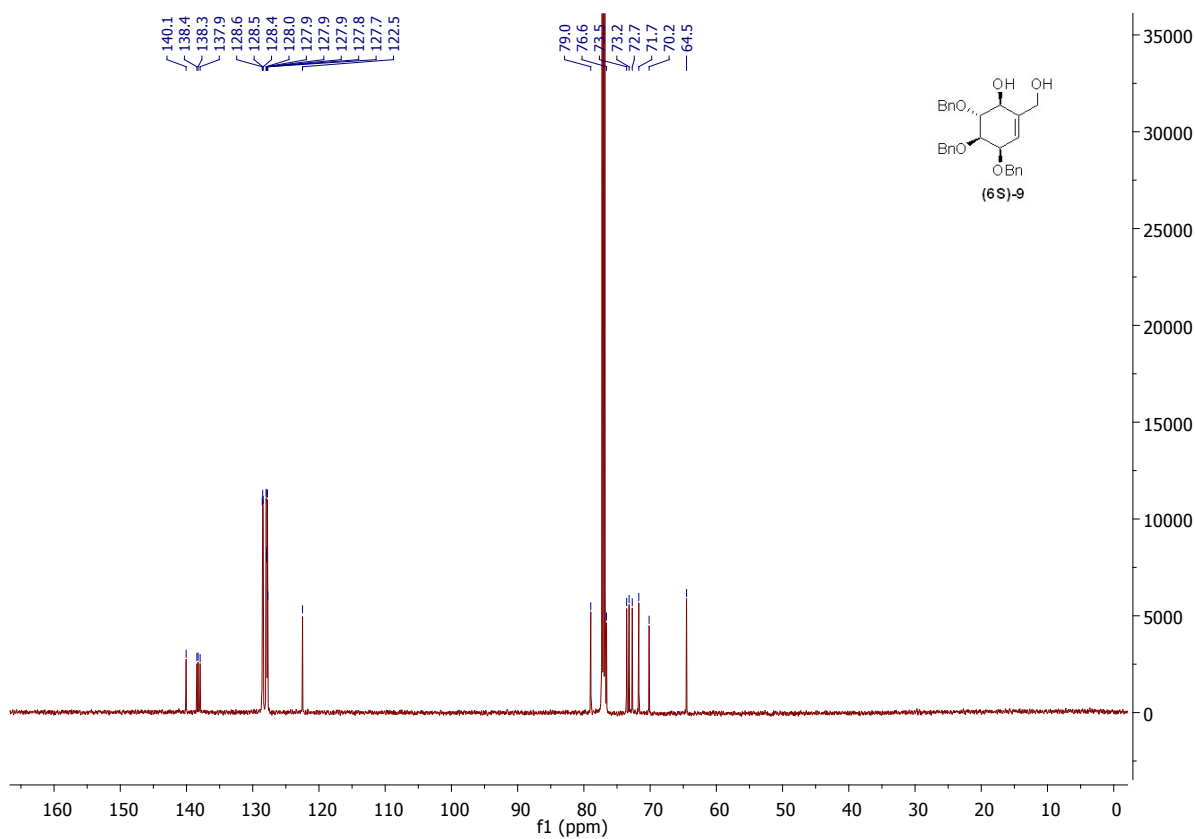

**<sup>13</sup>C-NMR Spectrum of Compound (6S)-9 (CDCl<sub>3</sub>)**

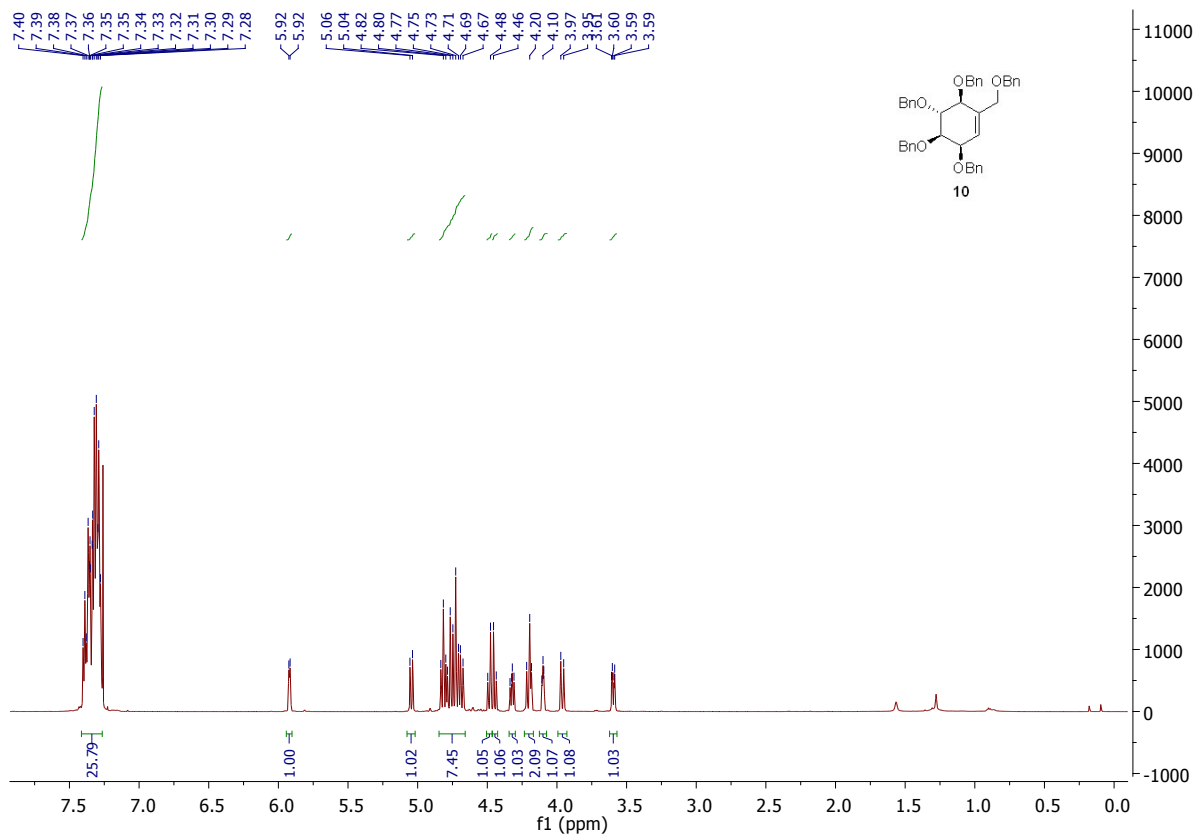

<sup>1</sup>H-NMR Spectrum of Compound 10 (CDCl<sub>3</sub>)

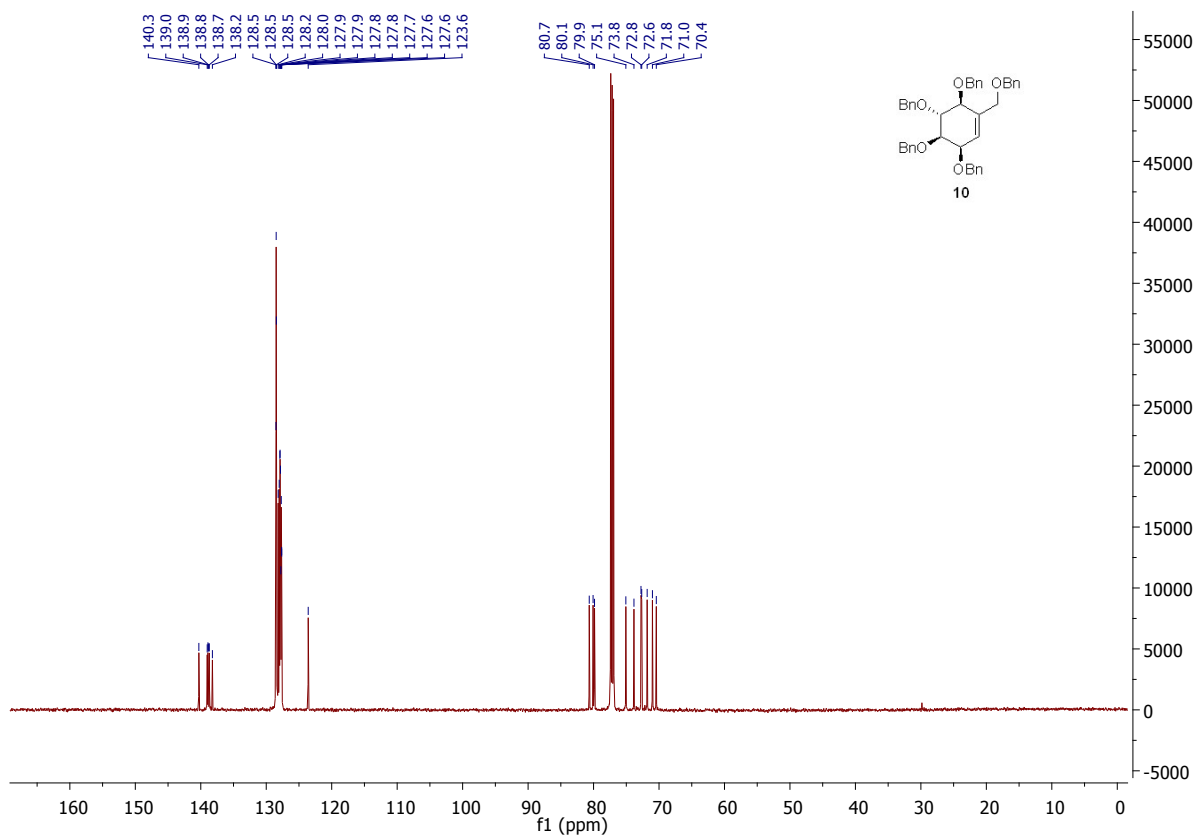

<sup>13</sup>C-NMR Spectrum of Compound 10 (CDCl<sub>3</sub>)

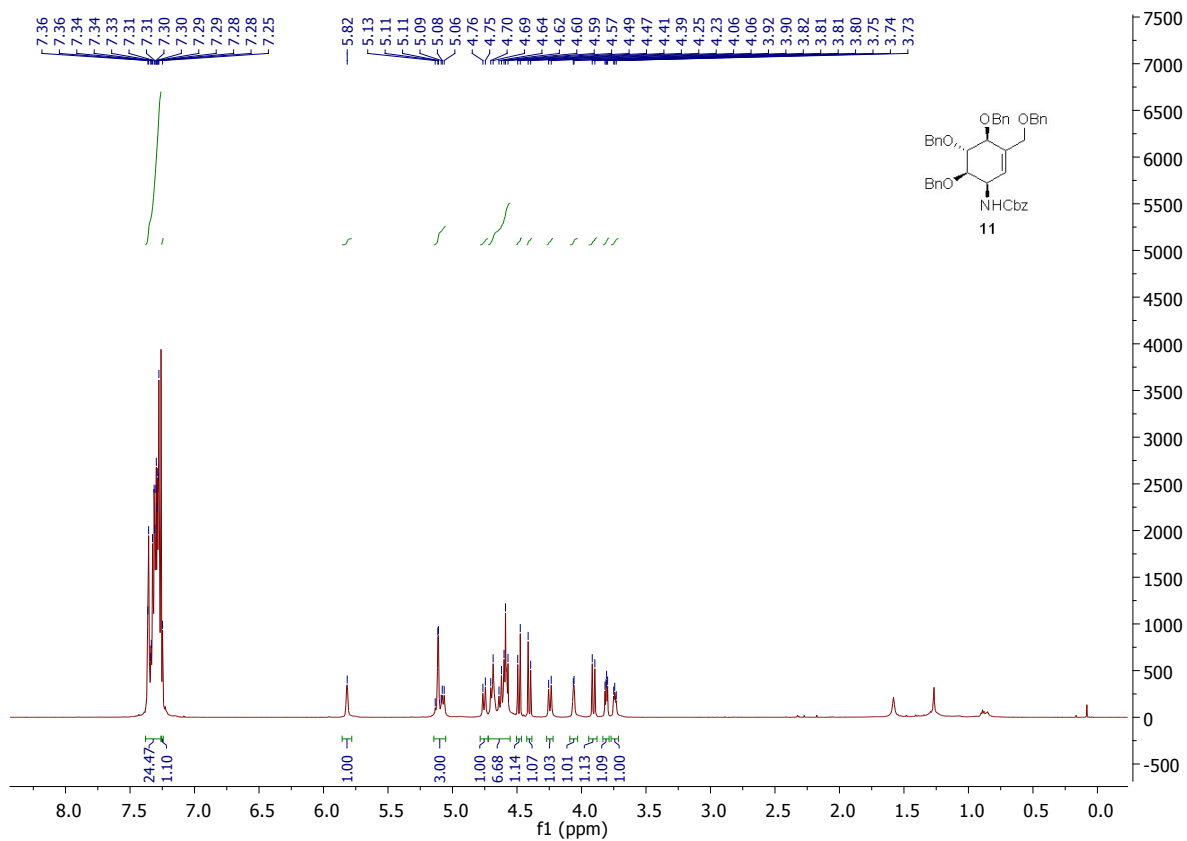

**<sup>1</sup>H-NMR Spectrum of Compound 11 (CDCl<sub>3</sub>)**

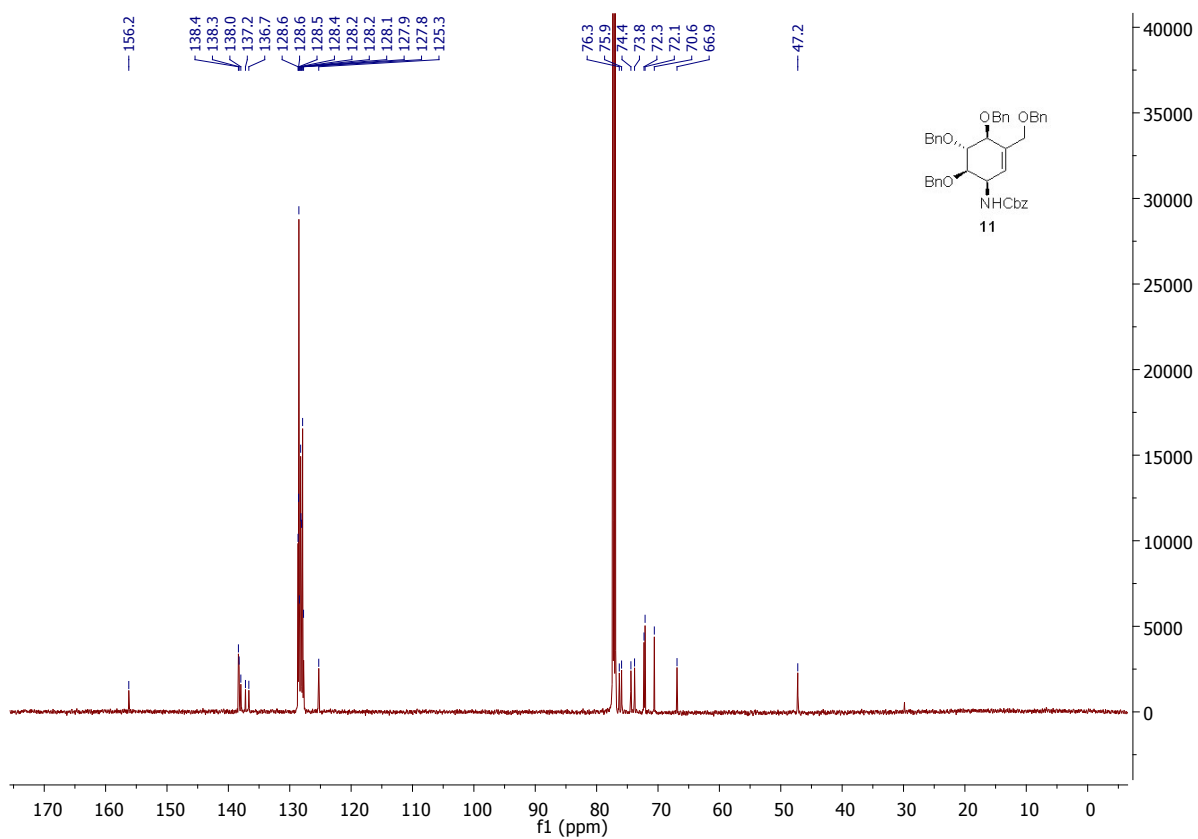

**<sup>13</sup>C-NMR Spectrum of Compound 11 (CDCl<sub>3</sub>)**

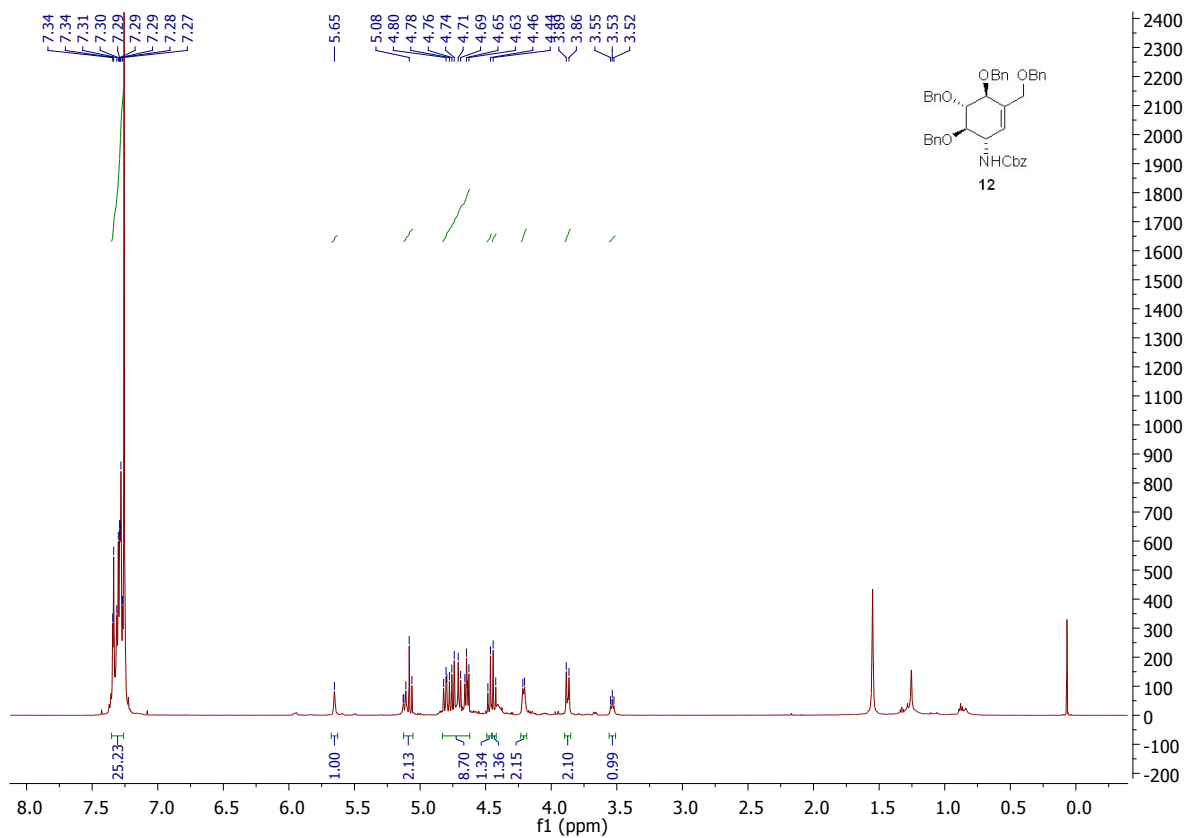

<sup>1</sup>H-NMR Spectrum of Compound 12 (CDCl<sub>3</sub>)

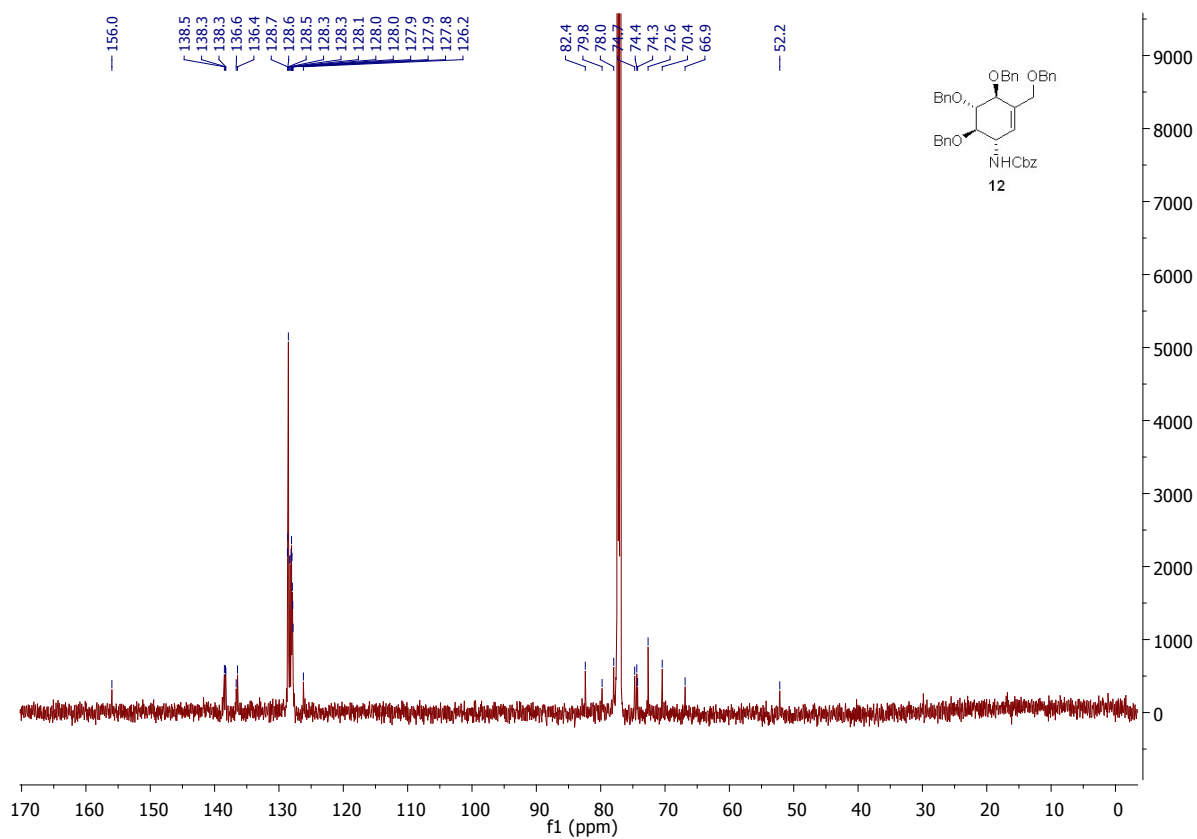

<sup>13</sup>C-NMR Spectrum of Compound 12 (CDCl<sub>3</sub>)

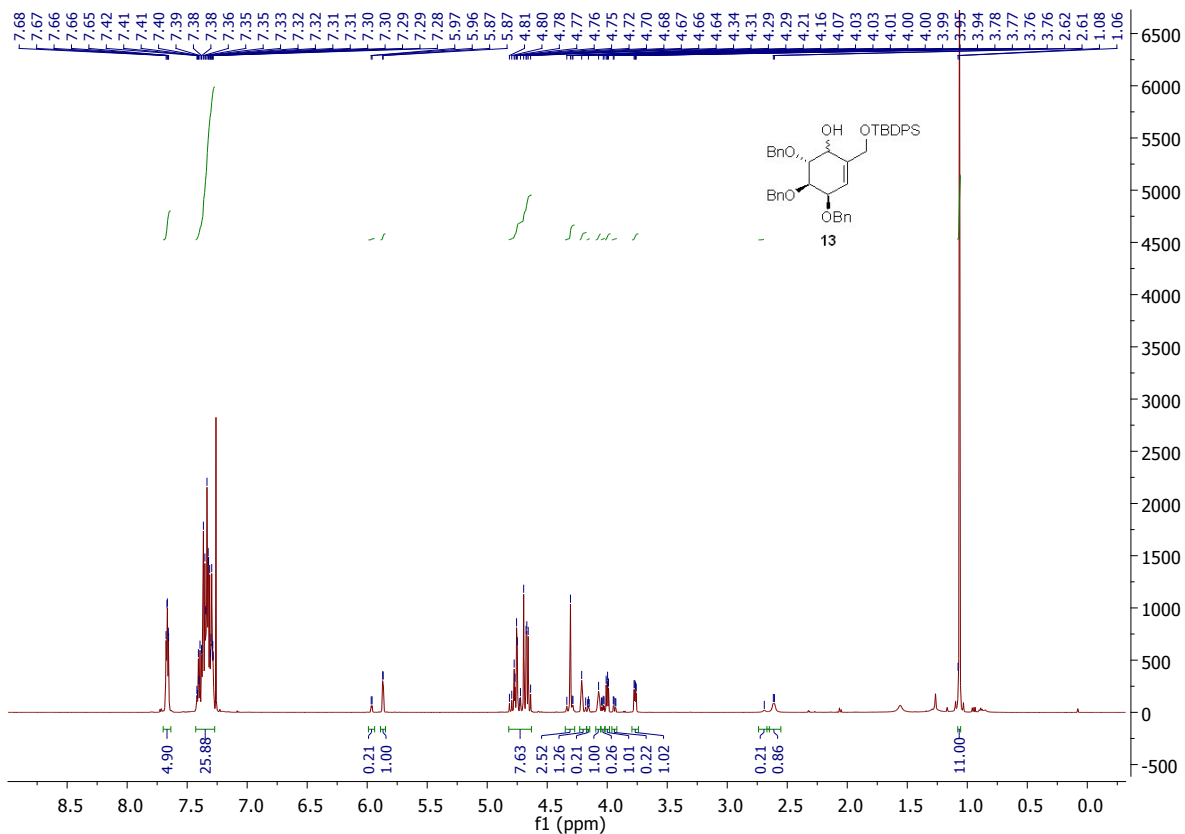

**<sup>1</sup>H-NMR Spectrum of Compound 13 (CDCl<sub>3</sub>)**

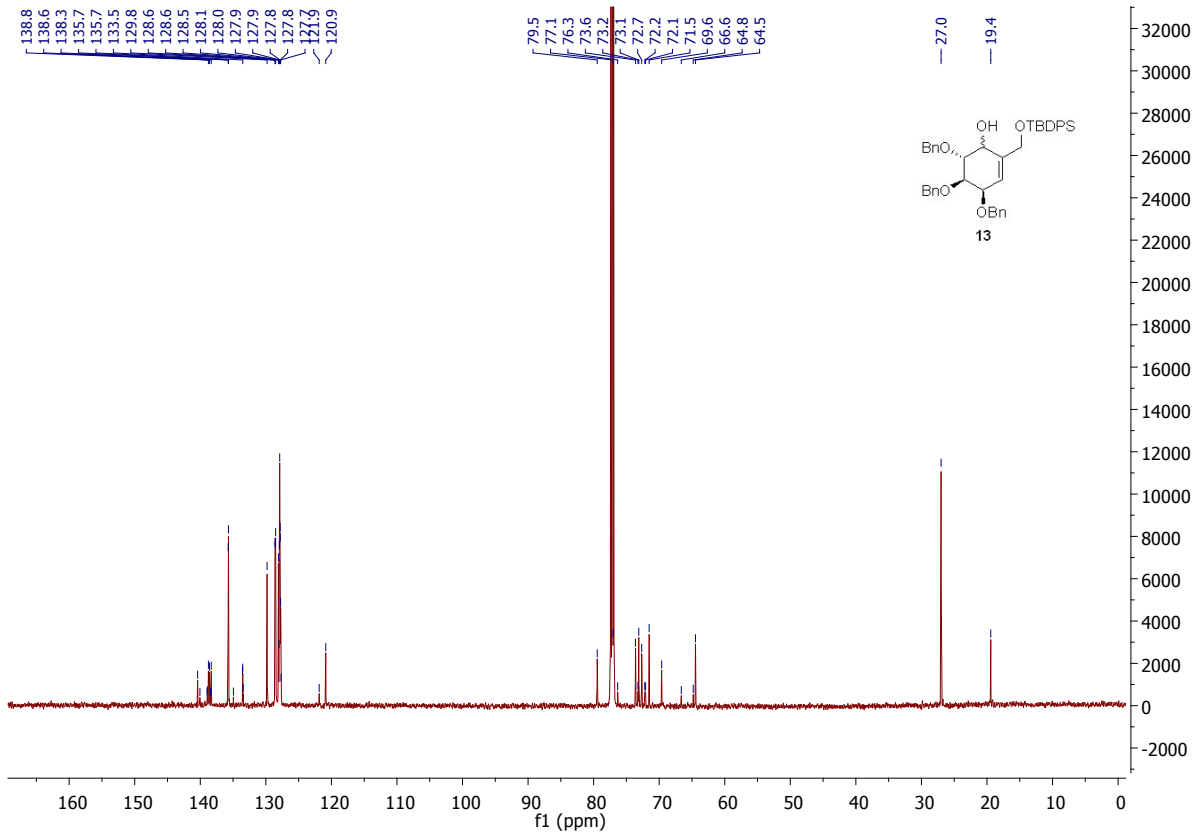

**<sup>13</sup>C-NMR Spectrum of Compound 13 (CDCl<sub>3</sub>)**

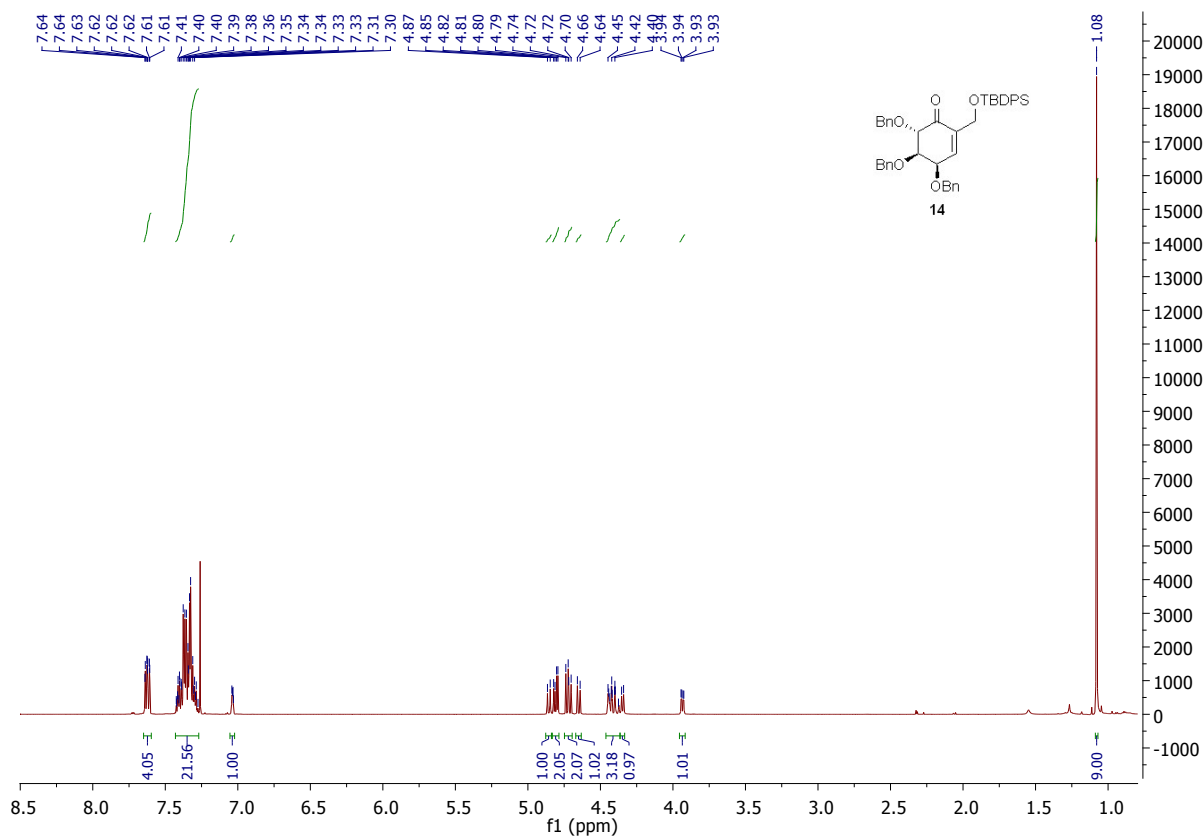

<sup>1</sup>H-NMR Spectrum of Compound 14 (CDCl<sub>3</sub>)

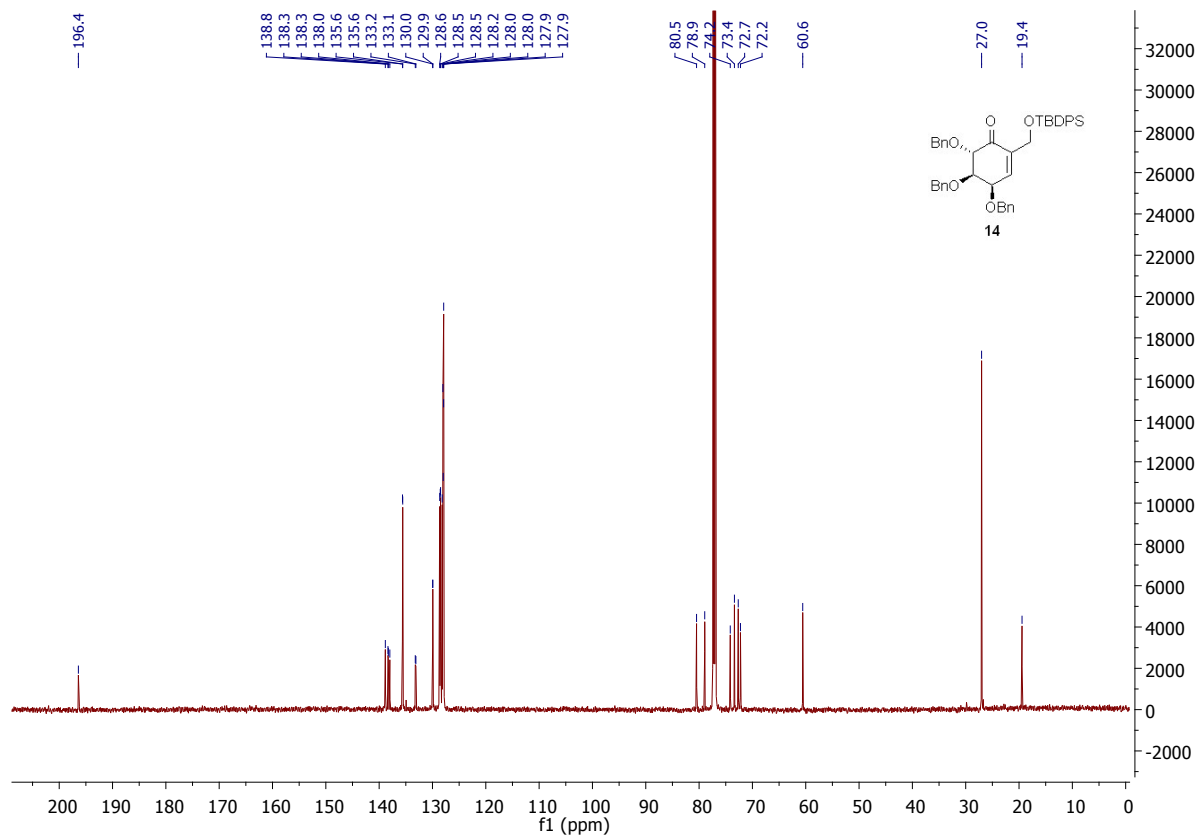

<sup>13</sup>C-NMR Spectrum of Compound 14 (CDCl<sub>3</sub>)

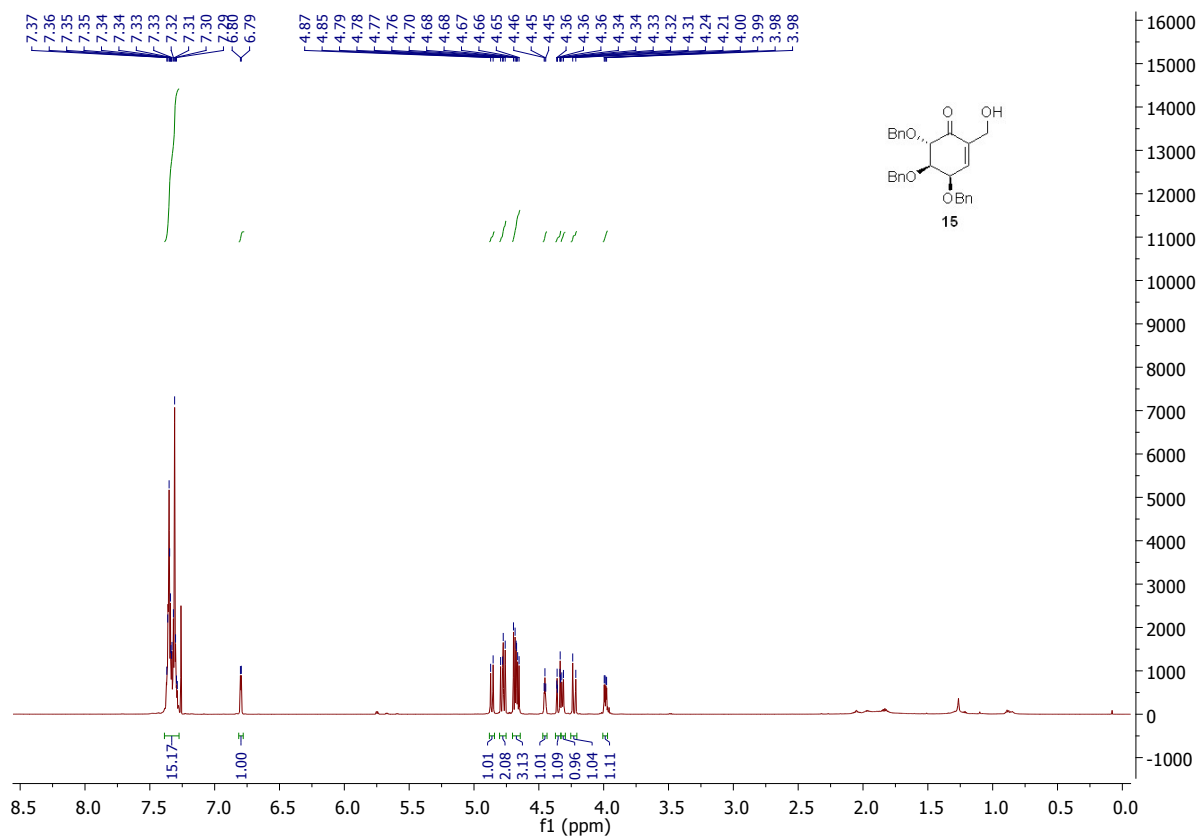

**<sup>1</sup>H-NMR Spectrum of Compound 15 (CDCl<sub>3</sub>)**

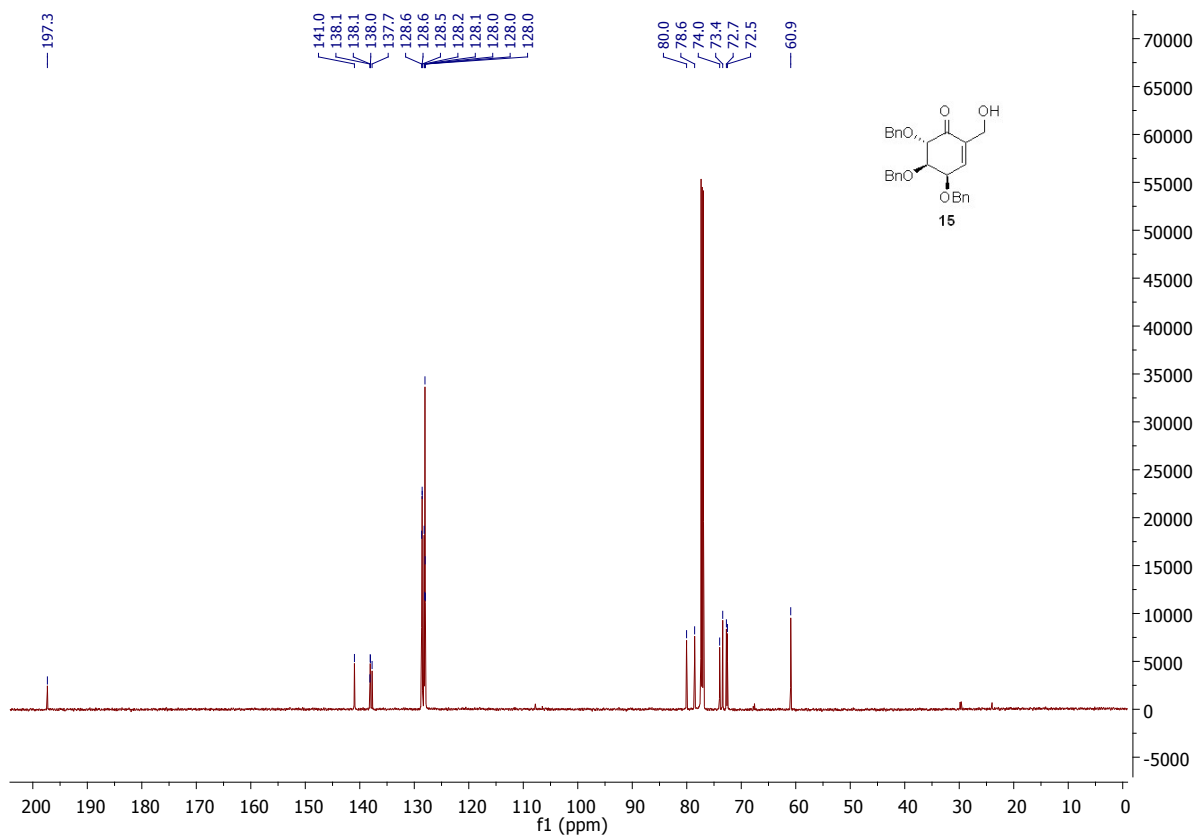

**<sup>13</sup>C-NMR Spectrum of Compound 15 (CDCl<sub>3</sub>)**



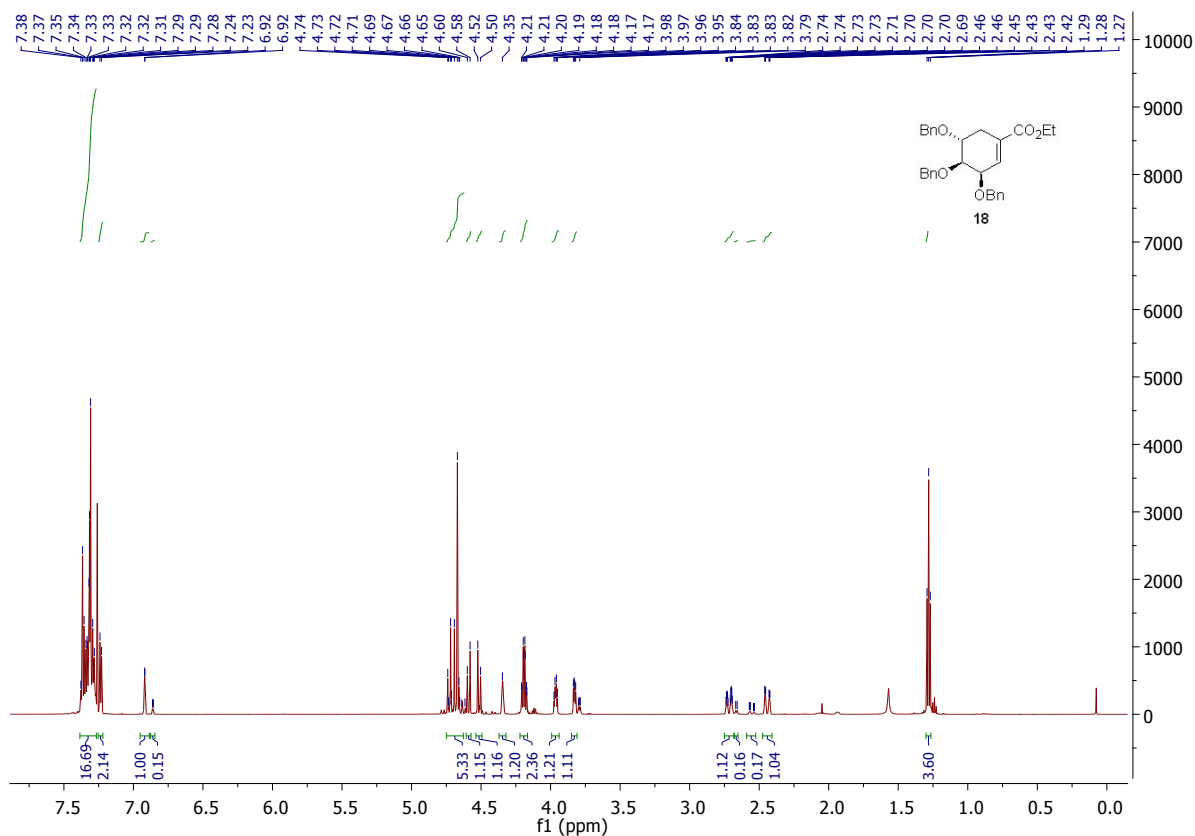

**<sup>1</sup>H-NMR Spectrum of Compound **18** (CDCl<sub>3</sub>)**

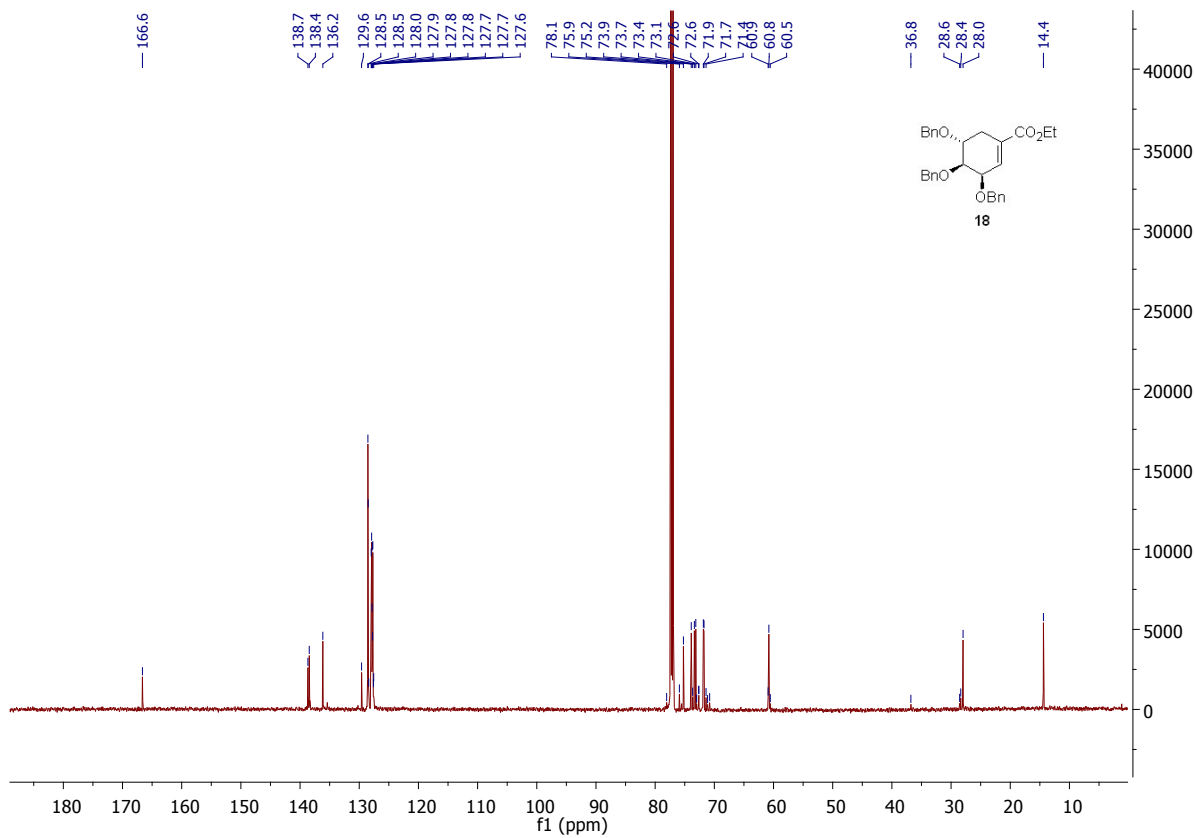

**<sup>13</sup>C-NMR Spectrum of Compound **18** (CDCl<sub>3</sub>)**

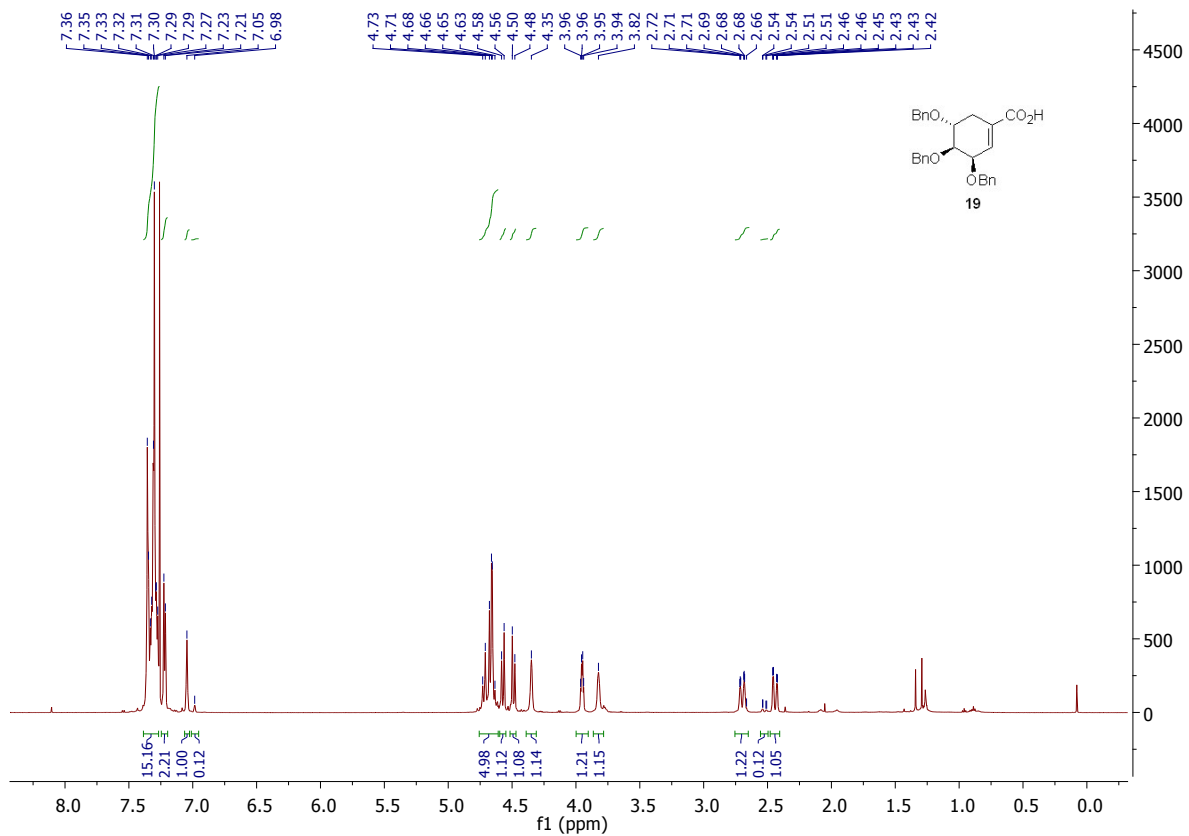

**<sup>1</sup>H-NMR Spectrum of Compound 19 (CDCl<sub>3</sub>)**

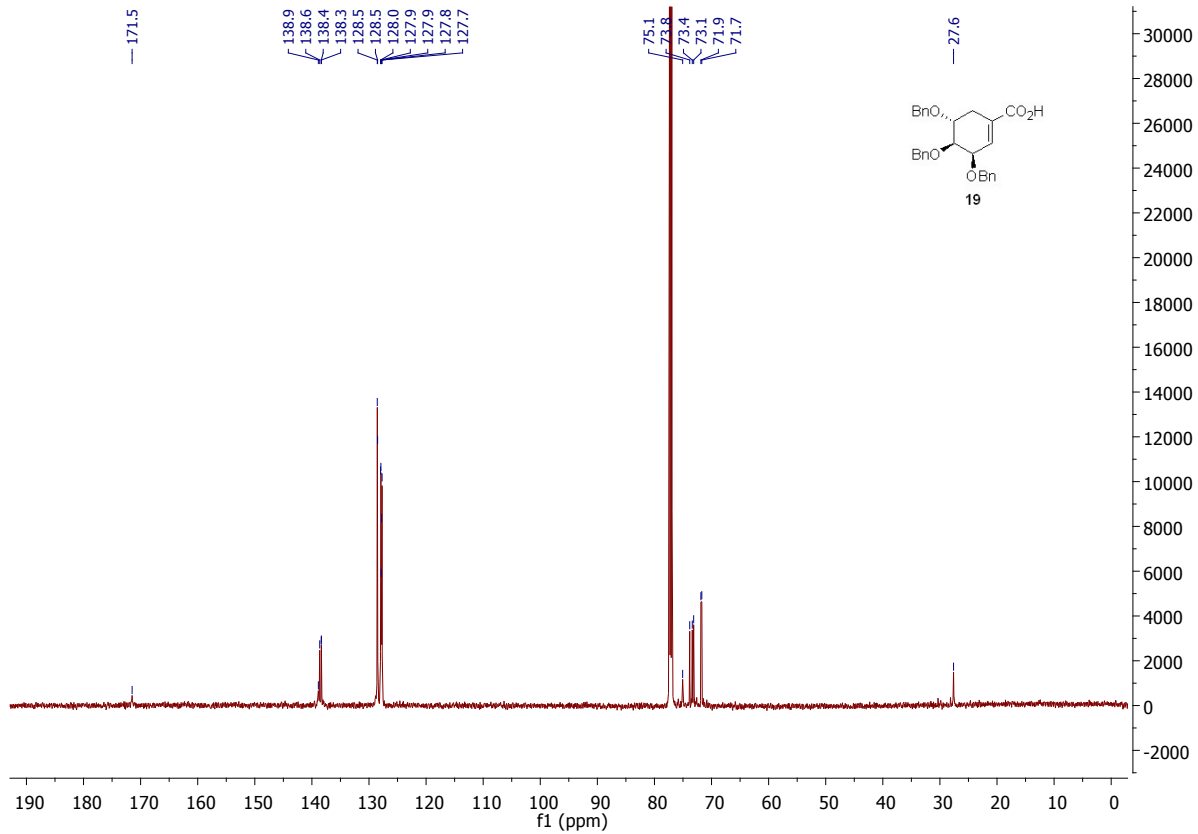

**<sup>13</sup>C-NMR Spectrum of Compound 19 (CDCl<sub>3</sub>)**

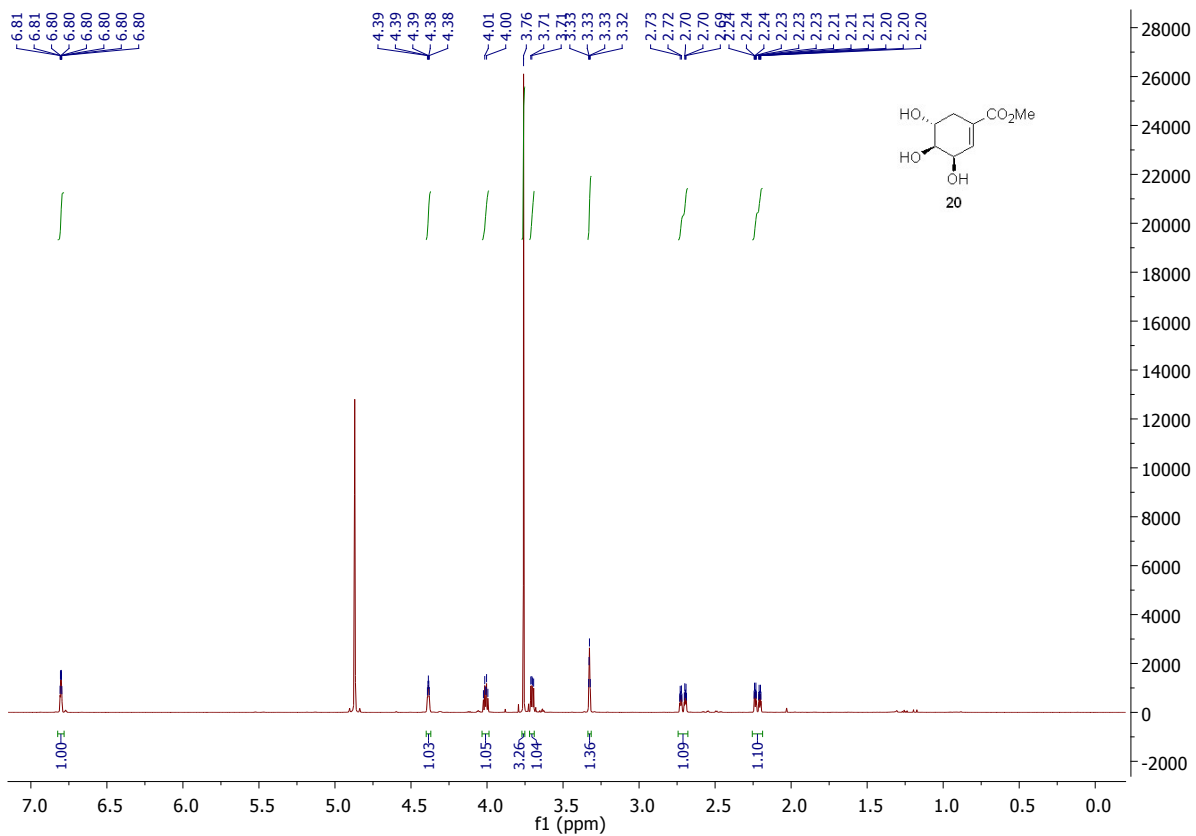

<sup>1</sup>H-NMR Spectrum of Compound 19 (MeOD)

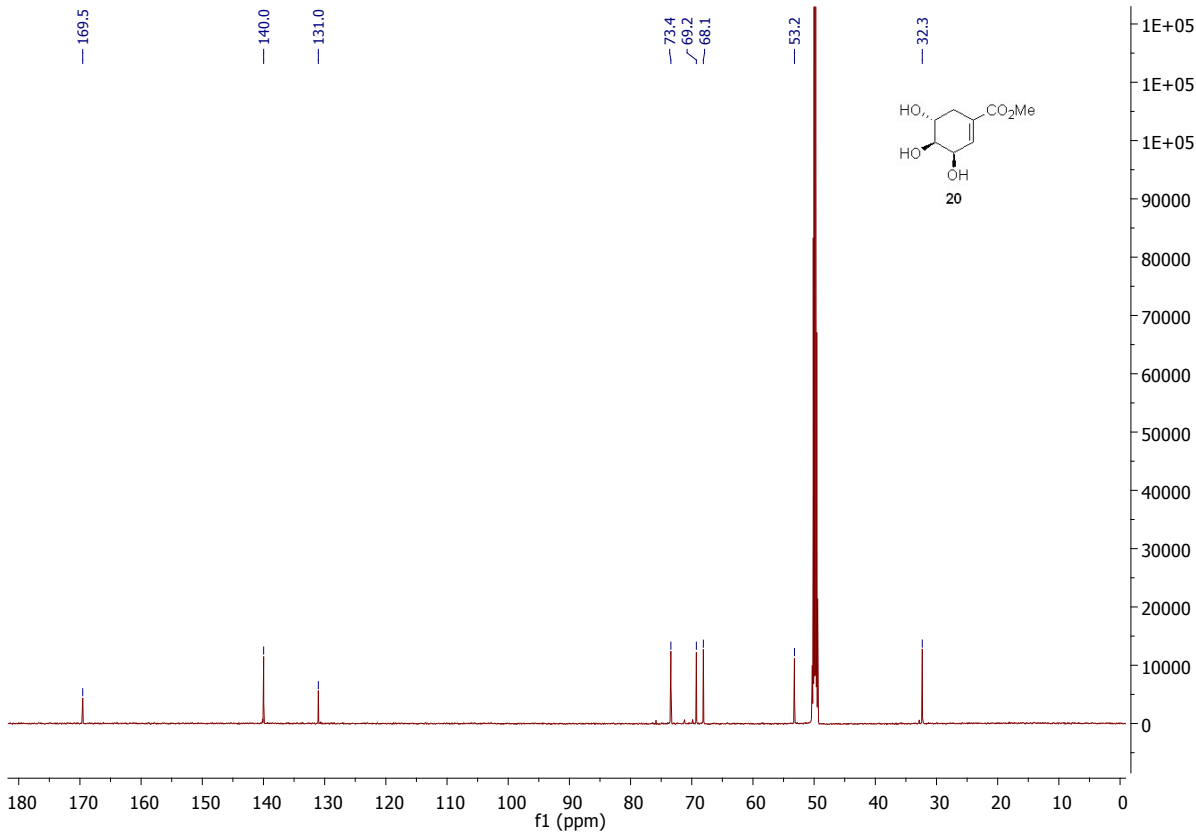

<sup>13</sup>C-NMR Spectrum of Compound 20 (MeOD)
